2020-11-24

1  
2  
3  
4  
5  
6  
7  
8  
9  
10  
11  
12  
13  
14  
15  
16  
17  
18  
19  
20  
21  
22  
23  
24  
25  
26  
27  
28

eNOS-induced vascular barrier disruption in retinopathy by c-Src activation and tyrosine phosphorylation of VE-cadherin

Takeshi Ninchoji<sup>1</sup>, Dominic T. Love<sup>1</sup>, Ross O. Smith<sup>1</sup>, Marie Hedlund<sup>1</sup>,  
Dietmar Vestweber<sup>2</sup>, William C. Sessa<sup>3</sup> and Lena Claesson-Welsh<sup>1#</sup>

- 1) Uppsala University, Rudbeck Laboratory, Department of Immunology, Genetics and Pathology, Uppsala, Sweden
- 2) Max Planck Institute for Molecular Biomedicine, Münster, Germany.
- 3) Yale University School of Medicine, Department of Pharmacology and Vascular Biology and Therapeutics Program, New Haven, USA

#) Corresponding author at the address above or email: [lena.welsh@igp.uu.se](mailto:lena.welsh@igp.uu.se)

Short title: eNOS regulates c-Src and VE-cadherin

Subject areas: Medicine, Cell Biology

2020-11-24

29 **Abstract**

30 Hypoxia and the production of vascular endothelial growth factor A (VEGFA) promote  
31 blood vessel leakiness and edema in ocular diseases. Therapeutics targeting VEGFA  
32 suppress leakiness and edema but aggravate hypoxia; therefore, new therapeutics are  
33 needed. We examined the role of endothelial nitric oxide synthase (eNOS) in  
34 pathological neovascularization and vessel permeability during oxygen-induced  
35 retinopathy. NO formation was suppressed chemically using L-NMMA, or genetically,  
36 in eNOS serine to alanine (S1176A) mutant mice, resulting in reduced retinal  
37 neoangiogenesis. Both strategies resulted in reduced vascular leakage by stabilizing  
38 endothelial adherens junctions through suppressed phosphorylation of vascular  
39 endothelial (VE)-cadherin Y685 in a c-Src-dependent manner. Intervention treatment  
40 by a single dose of L-NMMA in established retinopathy restored the vascular barrier  
41 and prevented leakage. We conclude that eNOS induces destabilization of adherens  
42 junctions and vascular hyperpermeability by converging with the VEGFA/VEGFR2/c-  
43 Src/VE-cadherin pathway and that this pathway can be selectively inhibited by blocking  
44 NO formation.

45

46 **Abbreviations:** *eNOS; endothelial nitric oxide synthase, L-NMMA; Nw-Methyl-L-*  
47 *arginine acetate, Nos3; gene designation for murine endothelial nitric oxide synthase*  
48 *3, OIR; oxygen-induced retinopathy, PLA; proximity ligation assay, VEGFA; vascular*  
49 *endothelial growth factor A; VE-cadherin; vascular endothelial-cadherin*

50

2020-11-24

## 51 **Introduction**

52 Pathological neovascularization is intimately associated with the progression of several  
53 retinal diseases, including retinopathy of prematurity, diabetic retinopathy, and  
54 exudative age-related macular degeneration. Neovascularization occurs in response  
55 to hypoxia, tissue ischemia and the consequent production of angiogenic agonists,  
56 such as vascular endothelial growth factor A (VEGFA), a potent inducer of vessel  
57 formation and vascular leakage (Campochiaro, 2015; Semenza, 2012). The new  
58 vessels formed during retinal ischemia are often dysfunctional and fail to stabilize  
59 (Fruttiger, 2007; Krock, Skuli, & Simon, 2011), leading to vessel leakage or  
60 hemorrhaging, and to retinal detachment, visual impairment and even blindness.  
61 Therefore, suppression of neoangiogenesis and thereby, retinal edema, is a  
62 therapeutic goal in the treatment of ischemic eye diseases (Daruich et al., 2018).

63 A number of therapeutic options designed to neutralize VEGFA by preventing binding  
64 to its receptor, VEGF receptor 2 (VEGFR2), such as bevacizumab, ranibizumab, and  
65 aflibercept, decrease neovascular formation as well as edema (Mintz-Hittner, Kennedy,  
66 Chuang, & Group, 2011). However, they do not correct the underlying hypoxia, in fact,  
67 vessel regression may instead further aggravate hypoxia. Moreover, in many cases  
68 anti-VEGF therapies can induce an elevation in intraocular pressure and hemorrhaging  
69 (Wells et al., 2015). The repeated intravitreal injections of anti VEGF-therapy present  
70 a potential for infections and scarring (Patel, Cholkar, Agrahari, & Mitra, 2013), in  
71 addition, side effects including disrupted neural development in infants have been  
72 reported (Morin et al., 2016). Thus, even though the current therapy improves vision  
73 for many patients in the early phases of disease, there is a clear need for developing

2020-11-24

74 new treatments to suppress proangiogenic stimuli while also achieving a long-lasting  
75 effect with safe administration.

76 Angiogenesis and vascular permeability in the retina are initiated primarily by the  
77 VEGFA/VEGFR2 signaling pathway. VEGFR2 is found on blood vascular endothelial  
78 cells but also on neuronal cells in the retina, explaining the side effect of  
79 VEGFA/VEGFR2 suppression on neural development in premature infants. VEGFR2  
80 activity is initiated through VEGFA-induced receptor dimerization, kinase activation,  
81 phosphorylation of tyrosine residues in the receptor intracellular domain and activation  
82 of signaling pathways. The VEGFR2 phosphotyrosine-initiated signaling pathways are  
83 now being unraveled. Thus, the phosphorylation of Y1212 in VEGFR2 is required for  
84 activation of phosphatidyl inositol 3 kinase and AKT (Testini et al., 2019), while  
85 phosphorylation of Y949 is required for activation of the c-Src pathway and regulation  
86 of vascular permeability through vascular endothelial (VE)-cadherin (Li et al., 2016).  
87 VE-cadherin is the main component of endothelial adherens junctions, strongly  
88 implicated in regulation of vascular permeability, leakage and associated edema  
89 (Giannotta, Trani, & Dejana, 2013). In particular, phosphorylation of the Y685 residue  
90 in VE-cadherin correlates with VEGFA-induced vascular hyperpermeability (Smith et  
91 al., 2020; Wessel et al., 2014), where Y685 phosphorylation leads to the dissociation  
92 of the homophilic interactions between VE-cadherin molecules expressed on adjacent  
93 endothelial cells (Giannotta et al., 2013).

94 Endothelial nitric oxide synthase (eNOS), activated downstream of VEGFA through  
95 phosphorylation on S1177 (S1176 in mice) by AKT (Fulton et al., 1999), produces nitric  
96 oxide (NO) and regulates vascular permeability. Both mice with a constitutive eNOS  
97 gene (*Nos3*) inactivation (Fukumura et al., 2001), and mice expressing an eNOS serine

2020-11-24

98 to alanine point mutation (S1176A) (*Nos3*<sup>S1176A/S1176A</sup>) (Di Lorenzo et al., 2013) show  
99 reduced extravasation of bovine serum albumin in the healthy skin in response to  
100 VEGFA challenge. An important mediator of the effect of eNOS-generated NO is the  
101 relaxation of perivascular smooth muscle cells, leading to increased vessel diameter  
102 and enhanced blood flow and thereby flow-driven vascular sieving (Sessa, 2004). In  
103 addition, eNOS activity correlates with tyrosine phosphorylation of VE-cadherin in  
104 cultured endothelial cells (Di Lorenzo et al., 2013), providing a mechanism for how  
105 eNOS activity may directly affect vascular permeability, distinct from vasodilation.

106 In contrast to the skin vasculature, the healthy retinal vasculature is protected by a  
107 stringent blood-retinal barrier. In retinal diseases, the barrier is disrupted, leading to  
108 increased vascular permeability (Zhao, Nelson, Betsholtz, & Zlokovic, 2015). In  
109 accordance, NO and related reactive oxygen species (ROS) are important pathogenic  
110 agents in retinopathy (Opatrilova et al., 2018). However, the molecular mechanisms  
111 whereby eNOS/NO interferes with the retinal vascular barrier and contributes to  
112 pathological vascular permeability in eye disease have remained unexplored. Here, we  
113 show that suppressed NO formation via the use of the competitive NOS inhibitor, L-  
114 NMMA, or an eNOS mutant, S1176A, negates neovascular tuft formation and vascular  
115 leakage during retinal disease. Mechanistically, NO promotes c-Src Y418  
116 phosphorylation at endothelial junctions and phosphorylation of VE-cadherin at Y685,  
117 required for dismantling of adherens junctions. Inhibition of NO formation by L-NMMA  
118 treatment suppresses vascular leakage also from established neovascular tufts,  
119 separating regulation of leakage from the angiogenic process as such. Mice  
120 expressing a VE-cadherin tyrosine to phenylalanine mutation (VEC-Y685F) are  
121 resistant to eNOS inhibition, in support of that NO regulates adherens junctions through

2020-11-24

122 direct effects on c-Src and VE-cadherin. These data suggest that eNOS/NO promote  
123 vascular permeability not only through the established effect on vascular smooth  
124 muscle relaxation and increased flow-driven permeability to solute and small  
125 molecules in the precapillary arterial bed, but also through disruption of adherens  
126 junctions allowing leakage of larger molecules from the postcapillary venular bed.

2020-11-24

## 127 **Results**

### 128 **Reduced neoangiogenic tuft formation in C57BL/6 OIR with suppressed NO** 129 **formation**

130 To determine how eNOS inhibition affects pathological angiogenesis in retinopathy in  
131 C57BL/6J mice, pups were exposed to 75% oxygen from P7-P12 (hyperoxic period)  
132 where after they were placed at normal, atmospheric conditions (21% oxygen; relative  
133 hypoxic period) from P12-P17 (Figure 1A). During the P7-P12 hyperoxic period,  
134 VEGFA expression is suppressed, leading to endothelial cell death and avascularity in  
135 the superficial vessel layer (reviewed in (Scott & Fruttiger, 2010)). The relative  
136 decrease in oxygen concentration upon return to normal atmosphere at P12-P17  
137 induces hypoxia inducible factor-dependent gene regulation, causing oxygen-induced  
138 retinopathy (OIR) and the formation of neoangiogenic tufts (L. E. Smith et al., 1994)  
139 (see Figure 1B for schematic outline).

140 To specifically address the role of eNOS in vascular retinal disease, we used a genetic  
141 model in which eNOS S1176 (mouse numbering (Fulton et al., 1999); S1177 in human)  
142 is replaced by alanine (A) (Schleicher et al., 2009). Phosphorylation of eNOS on this  
143 serine residue is a prerequisite for eNOS-driven NO production which was verified  
144 using a Griess assay on isolated endothelial cells from *Nos3<sup>+/+</sup>* and *Nos3<sup>S1176A/S1176A</sup>*  
145 mice (Fig. 1C). Mice were subjected to the OIR regimen (Fig. 1D). After OIR-challenge,  
146 *Nos3<sup>S1176A/S1176A</sup>* P17 retinas showed reduced pathological tuft area compared to  
147 *Nos3<sup>+/+</sup>* (Figure 1E), while the extent of avascularity was the same (Figure 1F). The  
148 average size of individual tufts was reduced in the *Nos3<sup>S1176A/S1176A</sup>* pups (Figure 1G)  
149 while the total number of tufts formed after OIR was unaffected (Figure 1H). See Figure  
150 1 – source data 1, for vascular parameters and body weights of mice.

2020-11-24

151 The suppressed formation of neoangiogenic tufts in the absence of eNOS S1176  
152 phosphorylation was not due to developmental defects as *Nos3*<sup>S1176A/S1176A</sup> mice  
153 showed normal postnatal vascular development. Vascular plexus area and outgrowth  
154 in the retina, tip cell number and appearance, as well as branch points were all similar  
155 between the wild type and the *Nos3*<sup>S1176A/S1176A</sup> retinas (Figure 1 - figure supplement  
156 1A-G). At P12 after OIR-challenge, there was also no difference in the degree of  
157 avascularity in the retina between *Nos3*<sup>S1176A/S1176A</sup> and *Nos3*<sup>+/+</sup> pups, indicating that  
158 the strains responded similarly to the hyperoxic challenge (Figure 1 - figure supplement  
159 2A, B). Importantly, the reduced tuft area in the *Nos3*<sup>S1176A/S1176A</sup> condition was not a  
160 result of differences in *Nos3* or *Nos2* expression between the *Nos3*<sup>+/+</sup> and  
161 *Nos3*<sup>S1176A/S1176A</sup> mice before or after the OIR-challenge (Figure 1 - figure supplement  
162 3A, B). Reduced tuft area was also not a result of reduced VEGFA-production as an  
163 equally induced level of VEGFA was seen in the mutant and wildtype mice (Figure 1 -  
164 figure supplement 3C). It should also be noted that the low relative expression level of  
165 *Nos2* (encoding inducible nitric oxide synthase (iNOS)) compared to *Nos3* (Figure 1 -  
166 figure supplement 3D, E) emphasizes the primary role of eNOS as a source of  
167 endothelial NO, both in the unchallenged and OIR-treated condition.

168

### 169 **VEGFA induces eNOS phosphorylation and activity**

170 VEGFA produced during the relative hypoxia phase (P12-P17) is an important  
171 instigator of edema in retinopathy (Connor et al., 2009; Dor, Porat, & Keshet, 2001),  
172 which is characterized by leaky and dysfunctional vessels. VEGFA-mediated AKT  
173 activation leads to phosphorylation of eNOS at S1177 (Chen & Meyrick, 2004;  
174 Schleicher et al., 2009). In agreement, eNOS was phosphorylated on S1177 in



2020-11-24

175 VEGFA-treated human retinal microvascular endothelial cells (HRMEC). Induction of  
176 eNOS phosphorylation appeared with similar kinetics but slightly more potently by  
177 VEGFA than by the inflammatory mediator histamine (Figure 2 - figure supplement 1A,  
178 B; see Figure 2 - figure supplement 1C, D for antibody validation), a well-known inducer  
179 of eNOS activity (Thors, Halldorsson, & Thorgeirsson, 2004). eNOS phosphorylation  
180 was accompanied by NO production in response to VEGFA stimulation, as assessed  
181 using the fluorescent probe, DAF-FM diacetate added to the HRMEC culture medium.  
182 NO accumulated significantly by 1 min stimulation and still persisted at 10 min (Figure  
183 2 – figure supplement 1E). DAF-FM fluorescence, and therefore NO production, was  
184 blocked by incubating cells with L-NMMA (Figure 2 – figure supplement 1F), to the  
185 level of the untreated control. Combined, these data show that VEGFA is a potent  
186 inducer of eNOS activity and NO production.

187

188 **VE-cadherin phosphorylation at Y685 is reduced in *Nos3*<sup>S1176A/S1176A</sup> vessels after**  
189 **OIR due to the inhibition of c-Src Y418 phosphorylation**

190 VEGFA/VEGFR2 signaling and vessel leakage correlates with phosphorylation of VE-  
191 cadherin on Y685 (Orsenigo et al., 2012; Smith et al., 2020; Wessel et al., 2014). The  
192 level of pY685 VE-cadherin was examined by immunostaining of *Nos3*<sup>+/+</sup> and  
193 *Nos3*<sup>S1176A/S1176A</sup> retinas at P17 after OIR-challenge. pY685 VE-cadherin  
194 immunostaining, normalized to the total VE-cadherin area, was significantly lower in  
195 *Nos3*<sup>S1176A/S1176A</sup> tufts than in the WT tufts (Figure 2A, B).

196 Phosphorylation of VE-cadherin on Y685 is dependent on the cytoplasmic tyrosine  
197 kinase c-Src (Wallez et al., 2007). The NO-generating reagent, SNAP, can increase

2020-11-24

198 the levels of activated c-Src phosphorylated on Y418 in fibroblast cultures (Rahman et  
199 al., 2010) indicating a potential role for NO in c-Src activation. We therefore tested  
200 whether eNOS 1176 phosphorylation correlates with phosphorylation of c-Src at Y418.  
201 However, immunostaining for c-Src pY418 failed to reveal differences in pY418 c-Src  
202 levels between *Nos3<sup>+/+</sup>* and *Nos3<sup>S1176A/S1176A</sup>* retinas (Figure 2 – figure supplement 2A,  
203 B). This was most likely due to that the pY418 antibody recognized several related Src-  
204 family molecules such as Yes and Fyn. Therefore, endothelial cells were isolated from  
205 lungs of *Nos<sup>+/+</sup>* and *Nos3<sup>S1176A/S1176A</sup>* mice and treated or not with VEGFA. To  
206 specifically determine induction of c-Src pY418, and not related Src family kinases, we  
207 employed the proximity ligation assay (PLA) (Soderberg et al., 2006), using  
208 oligonucleotide-ligated secondary antibodies detecting primary antibodies against  
209 murine c-Src protein and the conserved pY418 residue. The c-Src pY418 PLA was  
210 combined with counterstaining for VE-cadherin (Figure 2C). As shown in Figure 2D,  
211 VEGFA stimulation increased PLA spots, representing c-Src pY418, at least five-fold  
212 in the isolated endothelial cells (iECs) from *Nos<sup>+/+</sup>* mice, but not in iECs from  
213 *Nos3<sup>S1176A/S1176A</sup>* mice (see Figure 2 – figure supplement 2C for PLA controls). The c-  
214 Src pY418 PLA spots co-localized with VE-cadherin immunostaining (Figure 2E).

215 These data indicate that eNOS S1176 phosphorylation and its role in the formation of  
216 NO are essential for the accumulation of active c-Src at endothelial junctions to induce  
217 the phosphorylation of VE-cadherin at Y685.

218

219

220

2020-11-24

## 221 **Suppressed vascular leakage in *Nos3*<sup>S1176A/S1176A</sup> retinas after OIR-challenge**

222 In the retina, the blood retina barrier (BRB) controls vascular permeability, however,  
223 the BRB is disrupted in retinopathies, causing edema and vision loss (Klaassen, Van  
224 Noorden, & Schlingemann, 2013; Zhao et al., 2015). Edema correlates with reduced  
225 vessel permeability, which is dependent on the phosphorylation status of VE-cadherin  
226 (Wessel et al., 2014) and c-Src activity (Wallez et al., 2007). To assess the role for  
227 eNOS specifically in vessel leakage after hypoxia-driven VEGFA production, 25 nm  
228 fluorescent microspheres were injected in the tail vein of P17 wildtype and  
229 *Nos3*<sup>S1176A/S1176A</sup> mice, after OIR-challenge. Confocal image analysis showed  
230 accumulation of microspheres outside the vascular tufts, in agreement with enhanced  
231 vessel leakage upon OIR (Figure 3A). The accumulation of microspheres normalized  
232 to tuft area, was significantly lower in *Nos3*<sup>S1176A/S1176A</sup> retinas compared to *Nos3*<sup>+/+</sup>  
233 (Figure 3B; Figure 3 - source data 1).

234

## 235 **Reduced tuft area as a result of pharmacological inhibition of NO formation**

236 The *Nos3*<sup>S1176A/S1176A</sup> mouse is unable to produce NO in the endothelium due to the  
237 non-phosphorylatable alanine replacing S1176. As we could not unequivocally exclude  
238 that the vascular effects observed in the *Nos3*<sup>S1176A/S1176A</sup> mutant were dependent on  
239 non-NO synthesis events linked to S1176 phosphorylation, we tested the effect of the  
240 cell permeable NOS inhibitor N $\omega$ -Methyl-L-arginine (L-NMMA), which inhibits NO  
241 formation from all three NOS variants (eNOS, inducible NOS and neuronal NOS).

242 Intraperitoneal injection of L-NMMA (20  $\mu$ g/g body weight) were given daily during P12-  
243 17 (injections on days P12-P16), i.e. treatment was initiated before pathological

2020-11-24

244 neovessels were established (prevention therapy). L-NMMA treatment significantly  
245 reduced the area of vascular tufts formed by P17 (Figure 4A, B) (Figure 4 – source  
246 data 2) but did not affect the avascular area (Figure 4C). The average tuft size was  
247 decreased (Figure 4D) while the total number of individual tufts increased with L-  
248 NMMA treatment (Figure 4E). As smaller tufts can fuse to form larger structures (Prahst  
249 et al., 2020), the increase in individual tufts in the L-NMMA-treated litter mates may  
250 reflect the suppressed growth and fusion of the tufts. We conclude that while chemical  
251 eNOS inhibition suppressed the growth of tufts, it did not block formation of tufts *per*  
252 *se*.

253

254 **NO and VE-cadherin Y685 phosphorylation operate on the same pathway**  
255 **regulating vascular leakage**

256 To further explore the relationship between NO and VE-cadherin pY685 in the  
257 formation of leaky, pathological vessels, we used mice expressing mutant VE-cadherin  
258 wherein phosphorylation at position 685 is abolished by exchanging the tyrosine (Y)  
259 for phenylalanine (F), termed VEC-Y685F (Wessel et al., 2014). VEC-Y685F mice  
260 show suppressed induction of vascular leakage in the healthy skin (Wessel et al., 2014).  
261 We hypothesized that if NO modulates vascular leakage and tuft formation via a non-  
262 VE-cadherin Y685 pathway, L-NMMA would impart an additional reduction in tuft area  
263 to OIR-challenged VEC-Y685F mice. To test whether the VEC-Y685F mouse would  
264 respond to NOS inhibition, L-NMMA (20 µg/g body weight) was administered by  
265 intraperitoneal injection of wildtype and VEC-685F mice during the relative hypoxic  
266 period (injections on days P12-P16). Results show that L-NMMA treatment did not  
267 further suppress tuft formation in Y685F mice at P17. The reduction in tuft area was

2020-11-24

268 similar, about 50%, in PBS and L-NMMA-treated Y685F retinas and comparable to that  
269 seen in L-NMMA-treated wildtype mice (Figure 4F, G) (Figure 4 – source data 2). The  
270 avascular area remained unaffected by all treatments (Figure 4H).

271

## 272 **Single-dose L-NMMA decreases vascular leakage in the retina**

273 We next aimed to mimic a clinical situation by administering L-NMMA to OIR-  
274 challenged wild type mice with established pathological vessels (intervention therapy).  
275 Mice were given one injection of L-NMMA (60 µg/g body weight) at P16. At P17,  
276 microspheres were injected and after 15 min, the experiment was terminated. The area  
277 of extravascular microspheres, assessed after normalization to tuft area (Figure 5A, B)  
278 or to total microsphere area (Figure 5A, C) was reduced by 50-60% after the single-  
279 dose treatment with L-NMMA compared to PBS. Of note, the total microsphere area  
280 was not affected by the L-NMMA treatment (Figure 5D), indicating that microspheres  
281 to a large extent were present in the vascular lumen in the L-NMMA treated condition  
282 while in the PBS control, they had crossed the disrupted barrier to the extravascular  
283 space. Importantly, the tuft area was not affected by the L-NMMA treatment (Figure  
284 5E) (Figure 5 – source data 1). Thus, these data indicate that leakage could be  
285 suppressed even from established neovascular structures.

286

287

288

289

2020-11-24

## 290 **Discussion**

291 The results presented here show that eNOS/NO can modulate endothelial barrier  
292 function to exacerbate vascular hyperpermeability in retinopathy by a direct effect on  
293 endothelial junctions (Figure 6). Historically, eNOS-generated NO is implicated in the  
294 regulation of vascular permeability by inducing the relaxation of perivascular smooth  
295 muscle cells. NO produced in endothelial cells diffuses across the vascular wall and  
296 activates soluble guanylate cyclase leading to protein kinase G activation in smooth  
297 muscle cells, lowering cellular  $Ca^{2+}$  and promoting vascular relaxation, increased blood  
298 flow and reduced blood pressure (Surks et al., 1999). Indeed, vessel dilation is a part  
299 of the tissue deterioration seen in diabetic retinopathy (Bek, 2013; Grimm & Willmann,  
300 2012). However, there are also indications for a direct role for eNOS and NO in  
301 endothelial cells, as constitutive eNOS deficiency inhibits inflammatory  
302 hyperpermeability in mouse cremaster muscle treated with platelet-activating factor  
303 (Hatakeyama et al., 2006). Moreover, NO can regulate phosphorylation of VE-cadherin  
304 in adherens junctions *in vitro* in microvascular endothelial cell cultures (Di Lorenzo et  
305 al., 2013). It is likely that these multifaceted effects of eNOS/NO are differently  
306 established in different vessel types. eNOS/NO-dependent vessel dilation is  
307 dependent on the vascular smooth muscle cell coverage in arterioles and arteries, in  
308 contrast, adherens junction stability affects mainly the postcapillary venular bed  
309 (Orsenigo et al., 2012). In the skin, pre-venular capillaries and postcapillary venules,  
310 with sparse vSMC coverage, respond to VEGFA with increased paracellular  
311 permeability while arterioles/arteries do not (Honkura et al., 2018). These distinctions  
312 are important as exaggerated and chronic VEGFA-driven paracellular permeability in  
313 disease leads to edema and eventually to tissue destruction (Nagy, Dvorak, & Dvorak,

2020-11-24

314 2012). Therefore, we explored the consequences of NO-deficiency using a mutant  
315 eNOS mouse model, with a serine to alanine exchange at 1176, as well as treatment  
316 with the NO-inhibitor L-NMMA, to examine how attenuating NO-production affects  
317 VEGFA-dependent pathological angiogenesis in ocular disease.

318 Our data shows that while the attenuation of eNOS S1176 phosphorylation was  
319 dispensable for vascular development in the retina and for endothelial survival during  
320 hyperoxia, growth of pathological vessel tufts in the subsequent phase of relative  
321 hypoxia was suppressed. Similarly, treatment with L-NMMA during the hypoxic phase  
322 reduced growth of vascular tufts in the retina. In agreement with earlier literature, we  
323 conclude that eNOS activity and NO formation influences pathological angiogenesis in  
324 the eye (Ando et al., 2002; Brooks et al., 2001; Edgar, Gardiner, van Haperen, de Crom,  
325 & McDonald, 2012). Of note, tufts that were established in the *Nos3*<sup>S1176A/S1176A</sup> mice  
326 leaked less, in spite of similar levels of VEGFA being produced as in the wildtype retina.  
327 In an attempt to mimic the clinical situation, we treated P16 mice with established  
328 vascular tufts with a single dose of L-NMMA. At the examination 24 h later, tuft area  
329 remained unaffected while the leakage of 25 nm microspheres was reduced by 50-  
330 60%. Whether leakage regulation is separable from the regulation of growth of new  
331 vessels has been a matter of debate. Pathological angiogenesis in the retina is  
332 intimately associated with leakage and edema (Smith et al., 2020). Exactly how  
333 junction stability plays a role in the neoangiogenic process is unclear. However,  
334 leakage and the production of a provisional matrix is postulated to be a prerequisite for  
335 the growth of angiogenic sprouts (reviewed in (Nagy et al., 2012)). With the effects of  
336 the L-NMMA intervention treatment shown here, we can conclude that these  
337 responses indeed can be separated, at least in the short term.

2020-11-24

338 L-NMMA, and its analog L-NAME, induce vasoconstriction by halting the NO/soluble  
339 guanylyl cyclase signaling pathway and consequent vasodilation (reviewed in (Ahmad  
340 et al., 2018; Thoonen, Sips, Bloch, & Buys, 2013)). Thus, a daily intake of L-NAME in  
341 rats (40-75  $\mu\text{g/g/day}$  for 4 – 8 weeks) leads to vasoconstriction (Ribeiro, Antunes, de  
342 Nucci, Lovisolo, & Zatz, 1992; Simko et al., 2018; Vrankova, Zemancikova, Torok, &  
343 Pechanova, 2019; Zanfolin et al., 2006). NOS inhibitors have also been used clinically,  
344 for example by administration of L-NMMA to increase the mean arterial pressure in  
345 cardiogenic shock. In a typical regimen,  $1\text{mg}\cdot\text{kg}^{-1}\cdot\text{hr}^{-1}$  of L-NMMA is administered over  
346 5 hours (Cotter et al., 2000). While we cannot exclude an effect on vasoconstriction  
347 with the single IP injection of L-NMMA used here (60  $\mu\text{g/g}$ ), blood flow appeared  
348 unaffected as equal amounts of microspheres arrived in the retinal vasculature, while  
349 leakage into the extravascular space was substantially reduced in the L-NMMA treated  
350 mice compared to the controls.

351 Mechanistically, our results place c-Src downstream of eNOS activity. c-Src has also  
352 been placed upstream of eNOS by c-Src's regulation of the PI3K-AKT pathway, of  
353 importance for eNOS activation (Haynes et al., 2003). VEGFR2-induced activation of  
354 c-Src has however been mapped to the pY949 residue in VEGFR2 (Li et al., 2016)  
355 while activation of Akt is dependent on Y1212 (Testini et al., 2019). In VEGFA-  
356 stimulated endothelial cells, c-Src is implicated in phosphorylation of VE-cadherin at  
357 Y685 and potentially other tyrosine residues, to induce vascular permeability (Orsenigo  
358 et al., 2012; Wallez et al., 2007). The fact that the mutant *VEC-Y685F* mice in which  
359 the Y685 residue has been replaced with a non-phosphorylatable phenylalanine, were  
360 resistant to L-NMMA inhibition, indicates that the VEGFR2 Y1212/eNOS/NO pathway  
361 acts on adherens junction through c-Src (Li et al., 2016). Combined, our data support



2020-11-24

362 a model in which eNOS phosphorylation at S1176 is required for the activation of c-  
363 Src, which in turn phosphorylates VE-cadherin at Y685, inducing transient  
364 disintegration of adherens junctions and increased paracellular permeability (Figure 6).  
365 These *in vivo* results provide meaningful mechanistic and therapeutic insight into  
366 retinal diseases accompanied by excessive permeability, such as diabetic retinopathy,  
367 age-related macular degeneration and retinopathy of prematurity (Antonetti, Klein, &  
368 Gardner, 2012; Cunha-Vaz, Bernardes, & Lobo, 2011).

369 A considerable challenge in analysis of c-Src activity is the close structural relatedness  
370 between the kinase domains of c-Src and the Src family members (SFKs) Yes and Fyn  
371 (Sato et al., 2009), which are also expressed in endothelial cells. The amino acid  
372 sequence covering the activating tyrosine is entirely conserved between these three  
373 cytoplasmic tyrosine kinases such that the antibodies against pY418 c-Src in fact  
374 reacts with all three SFKs. Thus, pY418 immunostaining of wildtype and  
375 *Nos3<sup>S1176A/S1176A</sup>* retinas after OIR failed to reveal a dependence on eNOS catalytic  
376 activity for activation of c-Src, in agreement with the findings of Di Lorenzo et al. (Di  
377 Lorenzo et al., 2013). However, combining oligonucleotide-linked secondary  
378 antibodies reacting with c-Src protein and pY418 Src in a PLA on isolated endothelial  
379 cells demonstrated a critical role for eNOS activity on accumulation of active, pY418-  
380 positive c-Src at endothelial junctions. The question remains how eNOS/NO influence  
381 c-Src activity? NO can couple to cysteine thiols to form S-nitroso-thiols, which may  
382 affect the folding and function of the target protein. In accordance, Rahman et al.  
383 demonstrated S-nitrosylation of c-Src at the kinase domain cysteine 498, correlating  
384 with increased c-Src activity (Rahman et al., 2010).

2020-11-24

385 Patients with diabetic retinopathy have elevated levels of NO in the aqueous humor  
386 and particular eNOS polymorphisms are associated with protection or increased risk  
387 for diabetic retinopathy (for a review, see (Opatrilova et al., 2018)) and macular edema  
388 (Awata et al., 2004). Our results show that pharmacological inhibition of NO production  
389 also in established disease can prevent vascular leakage. Thus, NO inhibitors applied  
390 in combination with anti-VEGF therapy could possibly be delivered in low but still  
391 efficient doses. Local delivery of NOS inhibitors may be needed to avoid drawbacks  
392 with systemic delivery such as hypertension, or any other vasoconstriction-associated  
393 adverse events.

394 In conclusion, the data presented here establish a critical role for eNOS in endothelial  
395 cells, regulating c-Src activation downstream of VEGFA/VEGFR2, and thereby, in VE-  
396 cadherin-regulated endothelial junction stability and vascular leakage in retinal  
397 pathology.

398

2020-11-24

399 **Materials and methods**

400 **Key Resources Table**

| Reagent type                                    | Designation                   | Source/reference           | Identifiers                              | Information      |
|-------------------------------------------------|-------------------------------|----------------------------|------------------------------------------|------------------|
| <i>Strain; strain background (Mus musculus)</i> | Nos3 <sup>+/-</sup>           | 10.1016/j.bbrc.2012.12.110 |                                          | C57BL/6J         |
| <i>Strain; strain background (Mus musculus)</i> | Nos3 <sup>S1176A/S1176A</sup> | 10.1016/j.bbrc.2012.12.110 |                                          | C57BL/6J         |
| <i>Strain; strain background (Mus musculus)</i> | VEC-WT                        | DOI: 10.1038/ni.2824       |                                          | C57BL/6J         |
| <i>Strain; strain background (Mus musculus)</i> | VEC-Y685F                     | DOI: 10.1038/ni.2824       |                                          | C57BL/6J         |
| <i>Antibody</i>                                 | Rat anti-VE-cadherin          | BD Biosciences             | Catalogue no. 555289<br>RRID:AB_395707   | Dilution; 1:100  |
| <i>Antibody</i>                                 | Rabbit anti-VE-cadherin pY685 | DOI: 10.1038/ncomms2199    |                                          | Dilution; 1:50   |
| <i>Antibody</i>                                 | Goat anti-VE-cadherin         | R&D systems                | Catalogue no. AF1002<br>RRID:AB_2077789  | Dilution; 1:200  |
| <i>Antibody</i>                                 | Mouse anti-eNOS               | Abcam                      | Catalogue no. ab76198<br>RRID:AB_1310183 | Dilution; 1:1000 |
| <i>Antibody</i>                                 | Mouse anti-Src GD11           | Merck Millipore            | Catalogue no. 05-184<br>RRID:AB_2302631  | Dilution; 1:200  |
| <i>Antibody</i>                                 | Rabbit anti-c-Src pY418       | Invitrogen                 | Catalogue no. 44-660G<br>RRID:AB_1500523 | Dilution; 1:100  |
| <i>Antibody</i>                                 | Mouse anti- $\alpha$ -tubulin | Sigma-Aldrich              | Catalogue no. T9026                      | Dilution; 1:1000 |

2020-11-24

|                 |                                                       |                          |                                          |                  |
|-----------------|-------------------------------------------------------|--------------------------|------------------------------------------|------------------|
|                 |                                                       |                          | RRID:AB_477593                           |                  |
| <i>Antibody</i> | Mouse anti-eNOS pS1177                                | BD Biosciences           | Catalogue no. 612392<br>RRID:AB_399750   | Dilution; 1:1000 |
| <i>Antibody</i> | Rat anti-CD31                                         | BD Biosciences           | Catalogue no. 553370<br>RRID:AB_394816   | Dilution; 1:200  |
| <i>Antibody</i> | Rabbit anti-ERG                                       | Abcam                    | Catalogue no. Ab92513<br>RRID:AB_2630401 | Dilution; 1:200  |
| <i>Antibody</i> | Donkey anti-Rabbit IgG                                | Thermo Fisher Scientific | Catalogue no. A-31572<br>RRID:AB_162543  | Dilution; 1:500  |
| <i>Antibody</i> | Donkey anti-Rat IgG                                   | Thermo Fisher Scientific | Catalogue no. A-21208<br>RRID:AB_141709  | Dilution; 1:500  |
| <i>Antibody</i> | Donkey anti-Goat IgG                                  | Thermo Fisher Scientific | Catalogue no. A-11055                    | Dilution; 1:500  |
| <i>Antibody</i> | Donkey anti-Mouse IgG, HRP                            | Thermo Fisher Scientific | Catalogue no. A-16011                    | Dilution; 1:1000 |
| <i>Kit</i>      | Griess Assay (Nitrate/Nitrite colorimetric assay kit) | Cayman Chemical          | Catalogue no. 780001                     |                  |
| <i>Reagent</i>  | CD31 microbeads, mouse                                | Miltenyi Biotec          | Catalogue no. 130-097-418                |                  |
| <i>Reagent</i>  | N $\omega$ -Methyl-L-arginine acetate salt (L-NMMA)   | Sigma-Aldrich            | Catalogue no. M7033                      |                  |
| <i>Reagent</i>  | Amersham ECL Prime Western Blotting Detection         | GE healthcare            | Catalogue no. RPN2232                    |                  |
| <i>Other</i>    | Nos3 primer                                           | Thermo Fisher Scientific | Mm00435217_m1                            |                  |

2020-11-24

|                 |                                                     |                          |                                         |                  |
|-----------------|-----------------------------------------------------|--------------------------|-----------------------------------------|------------------|
| <i>Other</i>    | Nos2 primer                                         | Thermo Fisher Scientific | Mm00440502_m1                           |                  |
| <i>Other</i>    | Vegfa primer                                        | Thermo Fisher Scientific | Mm00437306_m1                           |                  |
| <i>Other</i>    | TBP primer                                          | Thermo Fisher Scientific | Mm01277042_m1                           |                  |
| <i>Other</i>    | UBC primer                                          | Thermo Fisher Scientific | Mm02525934_g1                           |                  |
| <i>Other</i>    | VEGFA <sub>164</sub> , recombinant, mouse           | R&D systems              | Catalogue no. 493-MV/CF                 |                  |
| <i>Other</i>    | Fluoro-Max Dyed Green Aqueous Fluorescent Particles | Thermo Fisher Scientific | Catalogue no. G25                       |                  |
| <i>Other</i>    | Duolink In Situ PLA Probe anti-Rabbit MINUS         | Sigma-Aldrich            | Catalogue no. DUO92005                  |                  |
| <i>Other</i>    | Duolink In Situ PLA Probe anti-Mouse PLUS           | Sigma-Aldrich            | Catalogue no. DUO92001                  |                  |
| <i>Other</i>    | Duolink In Situ Detection Reagent (Orange)          | Sigma-Aldrich            | Catalogue no. DUO92007                  |                  |
| <i>Other</i>    | Hoechst 33342                                       | Thermo Fisher Scientific | Catalogue no. H3570                     | Dilution; 1:1000 |
| <i>Other</i>    | Alexa Fluor 488-Isolectin B4                        | Sigma-Aldrich            | Catalogue no. I21411<br>RRID:AB_2314662 | Dilution; 1:200  |
| <i>Other</i>    | Alexa Fluor 647-Isolectin B4                        | Sigma-Aldrich            | Catalogue no. I32450<br>RRID:SCR_014365 | Dilution; 1:200  |
| <i>Software</i> | ImageJ                                              | NIH, Bethesda, MD, USA   | RRID:SCR_003070                         |                  |
| <i>Software</i> | GraphPad Prism                                      | GraphPad                 | RRID:SCR_002798                         |                  |

401

402

2020-11-24

403 **Animal studies**

404 *Nos3*<sup>S1176A/S1176A</sup> mice on a C57Bl/6J background have been described (Schleicher et  
405 al., 2009). *VEC*<sup>Y685FY685F</sup> mice, also on C57Bl/6J background were generated using  
406 site-directed mutagenesis on a wildtype human VE-cadherin cDNA construct to create  
407 the Y685 to F685 mutation (Wessel et al., 2014). Both strains were maintained by  
408 crossing heterozygous mice. Wildtype C57Bl/6J mice (Jackson Laboratory) and the  
409 Y685F strain were treated, when indicated, with N $\omega$ -Methyl-L-arginine acetate salt (L-  
410 NMMA; Sigma-Aldrich) in PBS, 20  $\mu$ g/g body weight, by intraperitoneal injection from  
411 postnatal (P) day 12 to P16.

412 Wildtype mice were also treated, when indicated, with a single dose of L-NMMA in  
413 PBS, 60  $\mu$ g/g body weight, by intraperitoneal injection on P16. These mice were then  
414 used to perform microsphere assays on P17.

415 Mouse husbandry and OIR challenge took place at Uppsala University, and the Local  
416 Ethics committee approved all animal work for these studies Animal handling was in  
417 accordance to the ARVO statement for the Use of Animals in Ophthalmologic and  
418 Vision Research. All animal experiments were repeated in individually at least three  
419 times (biological repeats).

420

421 **Oxygen-induced retinopathy (OIR)**

422 A standard oxygen-induced retinopathy model was used (Connor et al., 2009). Briefly,  
423 each litter of pups was placed, along with the mother, into a chamber maintaining  
424 75.0% oxygen (ProOx 110 sensor and AChamber, Biospherix, Parish, NY) from P7-  
425 P12, when they returned to normal atmosphere (~21% oxygen) until P17 (termination).  
426 The lactating mother was removed each day, P8-P11, for 2 hours, to prevent oxygen

2020-11-24

427 toxicity. At P17, pups were weighed and sacrificed. Eyes were enucleated and fixed in  
428 4% paraformaldehyde (PFA) at room temperature for 30 minutes. See source data files  
429 for data on neoangiogenic tufts, avascular area and body weights at P17. No mice  
430 were excluded from analysis.

431

### 432 **Quantification of avascular area and neovascular tufts**

433 Avascular area and neovascular tuft formation were determined by immunostaining  
434 retinas followed by imaging (Leica SP8 confocal microscope) and analysis.  
435 Quantification of total vascularized area, central avascular area, and tuft area was  
436 performed by outlining images manually in ImageJ (NIH, Bethesda, MD). Using a  
437 tilescan of IB4 staining for the entire retina, the freehand selection tool was used to  
438 demarcate the vascular front, creating an ROI (region of interest) for the total  
439 vascularized area. The freehand selection tool was used to outline IB4 positive vessels  
440 from neovascular tufts (regions with disorganized dilated vessels). The ROIs for tufts  
441 were merged into a single ROI corresponding to the total neovascular tuft area for each  
442 retina. The tuft area normalized to the total vascularized area was reported as a  
443 percentage of the total retina that contained tufts. Similarly, the avascular region was  
444 determined using the freehand selection tool to outline the central avascular regions.  
445 Regions where the superficial layer of capillaries was absent were determined and  
446 merged to form a single ROI corresponding to the entire avascular region for each  
447 retina. The avascular area normalized to the total vascularized area was reported as a  
448 percentage of the total retina that was still avascular. The researcher was blinded to  
449 the genotype of the sample when performing quantifications

450

451

2020-11-24

452 **Microsphere assay**

453 For microsphere extravasation experiments, mice at P17 were briefly warmed under  
454 heat lamp to dilate tail veins before injection of microspheres (1% solution of 25 nm  
455 fluorescent microspheres; 50  $\mu$ l per mouse into the tail vein; ThermoFisher).  
456 Microspheres circulated for 15 minutes. To remove blood and microspheres from the  
457 retinal vessels, mice were perfused with room temperature phosphate-buffered saline  
458 (PBS) containing calcium chloride and magnesium chloride using a peristaltic pump  
459 for 2 min, under full isoflurane-anesthesia. The eyes were then enucleated and fixed  
460 in 4% paraformaldehyde (PFA) at room temperature for 30 minutes before dissection  
461 and mounting for microscopy (Leicas SP8 confocal microscope, 63x objective).

462 Using ImageJ software, the microsphere channel and IB4-vessel channel (488 for  
463 Green fluorescence and 647 for IB4) were adjusted with threshold (Huang for IB4 and  
464 Triangle for FITC) for each channel. Extravasated microsphere area was calculated by  
465 measuring the signal in the green fluorescence channel after removing any signal  
466 contained within the ROI corresponding to the IB4-positive area. The Analyze Particles  
467 function was employed to quantify the microspheres. A lower limit of 10 pixels was  
468 selected to distinguish the microsphere signal from background noise. The mean area  
469 density for each group of mice was calculated from the median value of all images of  
470 the eyes of each mouse (Fuxe et al., 2011). To quantify leakage based on microscopic  
471 images, the amount of tracer extravasation was normalized to blood vessel density.  
472 The researcher was blinded to the genotype of the sample when performing  
473 quantifications. See source files for data on neoangiogenic tufts and body weights at  
474 P17. No mice were excluded from analysis.

475



2020-11-24

## 476 **Endothelial cell isolation from mouse lung**

477 Mouse lungs were harvested from pups (age; P8 - P10), minced and digested in 2  
478 mg/ml collagenase type I (385 U/mg; Worthington) in PBS with Ca<sup>2+</sup>/Mg<sup>2+</sup> for 1 h at  
479 37°C. Cells were then isolated using CD31 Microbeads and MACS cell isolation  
480 equipment and reagents (Miltenyi Biotec). The cells were seeded at 3×10<sup>5</sup> cells/mL  
481 and cultured in MV2 medium with supplements and serum (PromoCell).

482

## 483 **Griess Reagent Assay**

484 Isolated endothelial cells were seeded at 3×10<sup>5</sup> cells/mL into 6 cm cell culture plates  
485 and allowed to adhere at 37°C and 5% CO<sub>2</sub> overnight. After 24 hrs a Griess Assay was  
486 performed (nitrate/nitrite colorimetric assay, Cayman chemical) according to the  
487 manufacturer's instruction. Once complete, the cells were lysed in 1% [w/v] NP 40, 25  
488 mM Tris HCl pH 7.6, 0.1% SDS, 0.15 M NaCl, 1% sodium deoxycholate, 1x Protease  
489 Inhibitor Cocktail (Roche) and concentration of nitrate/nitrite was normalised against  
490 cell protein concentration, measured using the BCA protein detection kit  
491 (ThermoFisher).

492

## 493 **Proximity Ligation Assay (PLA)**

494 Isolated endothelial cells, serum starved at 37°C in MV2 medium (containing no growth  
495 factors) 3 hrs before stimulation with VEGFA<sub>164</sub> (50 ng/ml; R&D Systems), followed by  
496 fixation in 3% PFA for 3 min, permeabilized in 0.1% Triton X-100 for 3 min, and  
497 postfixed in 3% PFA for 15 min. Samples were blocked in Duolink blocking buffer for 2  
498 hours at 37°C and used for PLA. The Duolink protocol (Sigma-Aldrich) was followed  
499 using anti-phospho-Src Tyr 418 (Invitrogen) and total c-Src (Merck Millipore)  
500 antibodies, and oligonucleotide-linked secondary antibodies, denoted PLUS and

2020-11-24

501 MINUS probes, followed by the detection of reactions with fluorescent probes. Upon  
502 completion of the PLA protocol, cells were counterstained with antibodies against VE-  
503 cadherin (R&D systems), and Hoechst 33342 (ThermoFisher) to detect nuclei. Only  
504 cells positive for VE-cadherin were imaged and analyzed. To determine c-Src p418  
505 association with VE-cadherin, a mask of the VE-cadherin channel was created and  
506 only points that aligned completely within the VE-cadherin mask were counted and  
507 expressed against the area of VE-cadherin per field of view (ImageJ software, NIH).  
508 As a technical control for each experiment, the same procedure was performed with  
509 the omission of either of the primary antibodies, or the PLUS/MINUS probes.

510

#### 511 **Immunofluorescent staining**

512 Whole mount immunostaining was performed on PFA-fixed retinas incubated in  
513 blocking buffer for 2 hours (Buffer b; bovine serum albumin (BSA)/2% fetal calf serum  
514 (FCS)/0.05% Na-deoxycholate/0.5% Triton X-100/0.02% Na Azide in PBS). Incubation  
515 with primary antibodies over night at 4°C on a rocking platform was followed by  
516 incubation with secondary antibodies overnight at 4°C. Retinas were mounted on  
517 slides using Fluormount G. Images were taken by Leica SP8 confocal microscope and  
518 acquired with the 10x or 63x objective. Processing and quantification of images was  
519 done with ImageJ software (NIH). Quantification in the retina of total vascularized area,  
520 central avascular area, and area covered by neovascular tufts was performed by  
521 outlining images manually in ImageJ. Avascular area and tuft area were normalized to  
522 the total vascularized area of the retina.

523

524

2020-11-24

## 525 **Quantitative real-time PCR**

526 RNA from retinas were purified using RNeasy Kit (Qiagen). One microgram of RNA  
527 was reverse transcribed using SuperScript III (Invitrogen) and quantitative PCR were  
528 assayed using Mus musculus primers against *Vegfa* (Mm00437306\_m1,  
529 ThermoFisher), *Nos3* (Mm00435217\_m1) and *Nos2* (Mm00440502\_m1). The  
530 expression levels were normalized against TATA binding protein (*TBP*) Mus musculus  
531 (Mm01277042\_m1, ThermoFisher) and Ubiquitin C (*UBC*) Mus musculus  
532 (Mm02525934\_g1, ThermoFisher).

533

## 534 **Cells culture and treatment**

535 Human retinal microvascular endothelial cells (HRMECs; Cell Systems, #ACBRI 181)  
536 were cultured in a complete classic medium kit with serum and CultureBoost (Cell  
537 Systems, #4Z0–500). The cells were used and passaged in 10 cm cell culture plates  
538 coated with attachment factor, between passages 5–10 for all experiments. All cells  
539 were serum starved for 3 hrs at 37°C in MV2 medium (containing no growth factors)  
540 before stimulation. Recombinant mouse VEGFA<sub>164</sub> ( R&D Systems), was used at 50  
541 ng/ml for in vitro analyses. L-NMMA (1 mM in PBS) was administrated 1 hr before  
542 stimulation with VEGFA.

543

## 544 **Western blot**

545 Cells were lysed in 1% [w/v] NP 40, 25 mM Tris HCl pH 7.6, 0.1% SDS, 0.15 M NaCl,  
546 1% sodium deoxycholate, 1x Protease Inhibitor Cocktail (Roche), 1 mM Na<sub>3</sub>VO<sub>4</sub>  
547 (Sigma), and centrifuged at 21,100 g for 10 min. Protein concentration was measured  
548 with the BCA protein detection kit (ThermoFisher). Proteins were separated on a 4-  
549 12% BisTris polyacrylamide gel (Novex by Life Technologies) and transferred to an

2020-11-24

550 Immobilon-P PVDF membrane (Millipore) using the Criterion Blotter system (BioRad).  
551 The membrane was blocked with 3-5% skim milk in Tris-buffered saline (TBS; 0.1%  
552 Tween). For phosphotyrosine antibodies blocking was done in 5% BSA in TBS, 0.1%  
553 Tween. The membrane was incubated with first antibodies overnight at 4°C.  
554 Membranes were then washed in TBS, 0.1% Tween and incubated with horseradish  
555 peroxidase (HRP)-conjugated secondary anti-mouse antibody (1:10,000; Invitrogen)  
556 in 3-5% skim milk, respectively, followed by final wash in TBS, 0.1% Tween and  
557 development using ECL prime (GE Healthcare). Luminescence signal was detected  
558 by the ChemiDoc MP system (BioRad) and densitometry performed using Image Lab  
559 software (ver 4, BioRad)

560

#### 561 **Antibodies**

562 Retinal vasculature was immunostained with directly-conjugated Alexa Fluor 488-  
563 Isolectin B4 (1:200; Sigma, I21411) or Alexa Fluor 647-Isolectin B4 (1:200; Sigma,  
564 I32450). EC junctions and phosphorylated VE-cadherin were detected with Anti-VE-  
565 cadherin antibody (1:100; BD, Rat, 555289) and affinity purified rabbit antibodies  
566 against VE-cadherin pY685; a kind gift from Prof. Elisabetta Dejana, Uppsala  
567 University/IFOM Milano<sup>18</sup>. For proximity ligation assays VE-cadherin was detected  
568 using mouse VE-cadherin antibody (1:200, R&D systems, Goat, AF1002). c-Src was  
569 detected using anti-Src (GD11 clone) antibody (1:200, Merck Millipore, Mouse, 05-  
570 184). Phosphorylated c-Src was assessed using anti-phospho-Src Tyr 418 antibody  
571 (1:100, Invitrogen, Rabbit, 44-660G). Nuclei were detected using Hoechst 33342  
572 (1:1000, ThermoFisher, H3570). For immunoblotting, the following antibodies were  
573 used as primaries: mouse-anti- $\alpha$ -tubulin (1:1000, Sigma, T9026), mouse anti-eNOS  
574 (1:1000, Abcam, ab76198), mouse anti-eNOS pS1177 (1:1000, BD, 612392).

2020-11-24

575 Secondary antibody: Amersham ECL Mouse IgG, HRP-linked whole Ab (from sheep)  
576 (1:10,000, GE Healthcare, NA931). Detection: Amersham ECL prime Western blotting  
577 detection reagent (GE healthcare, RPN2232).

578

### 579 **DAF FM DA assay**

580 Intracellular NO was measured in real time using the NO-specific fluorescence probe  
581 DAF-FM DA solution (Sigma Aldrich). DAF-FM DA diffuses freely across the  
582 membrane, and is hydrolyzed by intracellular esterases, resulting in the formation of  
583 DAF-FM. Intracellular DAF-FM reacts with the NO oxidation product  $N_2O_2$ , which  
584 generates the stable highly fluorescent derivative DAF-FM triazole. Cells were washed  
585 with modified HEPES Buffer (20 mM HEPES buffer (Gibco) with 5 mM glucose, 50  $\mu$ M  
586 L-Arginine and 0.1% BSA, pH7.0-7.4), incubated with 5  $\mu$ M DAF-FM DA in modified  
587 HEPES buffer for 30 min at room temperature, washed again and finally incubated in  
588 modified HEPES buffer for 30 min at 37°C in the absence or presence of 1 mM L-  
589 NMMA. Fluorescence (emission wavelength, 485 nm; excitation wavelength, 538 nm)  
590 was measured at 37°C from 1 to 10 min using a fluorescence microtiter plate reader  
591 (Synergy HTX Multi-Mode Reader, BioTek, USA). eNOS activity was expressed as the  
592 VEGFA-dependent increase in fluorescence per  $\mu$ g of cellular protein. To determine  
593 the cellular protein content the same cells were lysed in 1% (v/v) Triton X-100 and  
594 analyzed for protein content with the BCA protein detection kit. DAF-FM DA  
595 experiments were repeated three times. Within each experiment, four wells were used  
596 for each NO measurement.

597

598

2020-11-24

599 **Statistical analysis**

600 Statistical analysis was performed using GraphPad Prism 6 (GraphPad). An unpaired  
601 Student's T test was used to compare means among two experimental groups. Two-  
602 way ANOVAs were performed when two factors were involved, for example, treatment  
603 and genotype. Multiple comparisons post hoc tests were chosen based on how many  
604 group comparisons were made. In all analyses  $p < 0.05$  was considered a statistically  
605 significant result. Values shown are the mean, with standard error of the mean (S.E.M.)  
606 used as the dispersion measure. Biological replicates refer to individual mice/samples  
607 in a single experiment. Separate/individual experiments refer to experiments done at  
608 different times/days with independently generated material. A statistical method of  
609 sample size calculation was not used during the study design.

2020-11-24

610 **Acknowledgements**

611 Acknowledgement: We gratefully acknowledge the expert assistance of Pernilla  
612 Martinsson, Uppsala University.

613 Sources of funding: This study was supported by the Swedish Cancer foundation  
614 (CAN2016/578), the Swedish Research Council (2015-02375), the Knut and Alice  
615 Wallenberg foundation (KAW 2015.0030) and a Fondation Leducq Transatlantic  
616 Network of Excellence Grant in Neurovascular Disease (17 CVD 03). KAW also  
617 supported LCW with a Wallenberg Scholar grant (2015.0275). WCS was supported by  
618 Grants R35 HL139945, P01 HL1070205, AHA MERIT Award.

619 **Competing Interests**

620 Disclosure: The authors declare no competing interests.

621

2020-11-24

## 622 **References**

- 623 Ahmad, A., Dempsey, S. K., Daneva, Z., Azam, M., Li, N., Li, P. L., & Ritter, J. K. (2018). Role of  
624 Nitric Oxide in the Cardiovascular and Renal Systems. *Int J Mol Sci*, *19*(9).  
625 doi:10.3390/ijms19092605
- 626 Ando, A., Yang, A., Mori, K., Yamada, H., Yamada, E., Takahashi, K., . . . Campochiaro, P. A.  
627 (2002). Nitric oxide is proangiogenic in the retina and choroid. *J Cell Physiol*, *191*(1), 116-124.  
628 doi:10.1002/jcp.10083
- 629 Antonetti, D. A., Klein, R., & Gardner, T. W. (2012). Diabetic retinopathy. *N Engl J Med*,  
630 *366*(13), 1227-1239. doi:10.1056/NEJMra1005073
- 631 Awata, T., Neda, T., Iizuka, H., Kurihara, S., Ohkubo, T., Takata, N., . . . Katayama, S. (2004).  
632 Endothelial nitric oxide synthase gene is associated with diabetic macular edema in type 2  
633 diabetes. *Diabetes Care*, *27*(9), 2184-2190. doi:10.2337/diacare.27.9.2184
- 634 Bek, T. (2013). Regional morphology and pathophysiology of retinal vascular disease. *Prog*  
635 *Retin Eye Res*, *36*, 247-259. doi:10.1016/j.preteyeres.2013.07.002
- 636 Brooks, S. E., Gu, X., Samuel, S., Marcus, D. M., Bartoli, M., Huang, P. L., & Caldwell, R. B.  
637 (2001). Reduced severity of oxygen-induced retinopathy in eNOS-deficient mice. *Invest*  
638 *Ophthalmol Vis Sci*, *42*(1), 222-228.
- 639 Campochiaro, P. A. (2015). Molecular pathogenesis of retinal and choroidal vascular  
640 diseases. *Prog Retin Eye Res*, *49*, 67-81. doi:10.1016/j.preteyeres.2015.06.002
- 641 Chen, J. X., & Meyrick, B. (2004). Hypoxia increases Hsp90 binding to eNOS via PI3K-Akt in  
642 porcine coronary artery endothelium. *Lab Invest*, *84*(2), 182-190.  
643 doi:10.1038/labinvest.3700027
- 644 Connor, K. M., Krah, N. M., Dennison, R. J., Aderman, C. M., Chen, J., Guerin, K. I., . . . Smith,  
645 L. E. (2009). Quantification of oxygen-induced retinopathy in the mouse: a model of vessel  
646 loss, vessel regrowth and pathological angiogenesis. *Nat Protoc*, *4*(11), 1565-1573.  
647 doi:10.1038/nprot.2009.187
- 648 Cotter, G., Kaluski, E., Blatt, A., Milovanov, O., Moshkovitz, Y., Zaidenstein, R., . . . Golik, A.  
649 (2000). L-NMMA (a nitric oxide synthase inhibitor) is effective in the treatment of  
650 cardiogenic shock. *Circulation*, *101*(12), 1358-1361. doi:10.1161/01.cir.101.12.1358
- 651 Cunha-Vaz, J., Bernardes, R., & Lobo, C. (2011). Blood-retinal barrier. *Eur J Ophthalmol*, *21*  
652 *Suppl 6*, S3-9. doi:10.5301/EJO.2010.6049
- 653 Daruich, A., Matet, A., Moulin, A., Kowalczyk, L., Nicolas, M., Sellam, A., . . . Behar-Cohen, F.  
654 (2018). Mechanisms of macular edema: Beyond the surface. *Prog Retin Eye Res*, *63*, 20-68.  
655 doi:10.1016/j.preteyeres.2017.10.006



2020-11-24

- 656 Di Lorenzo, A., Lin, M. I., Murata, T., Landskroner-Eiger, S., Schleicher, M., Kothiya, M., . . .  
657 Sessa, W. C. (2013). eNOS-derived nitric oxide regulates endothelial barrier function through  
658 VE-cadherin and Rho GTPases. *J Cell Sci*, *126*(Pt 24), 5541-5552. doi:10.1242/jcs.115972
- 659 Dor, Y., Porat, R., & Keshet, E. (2001). Vascular endothelial growth factor and vascular  
660 adjustments to perturbations in oxygen homeostasis. *Am J Physiol Cell Physiol*, *280*(6),  
661 C1367-1374. doi:10.1152/ajpcell.2001.280.6.C1367
- 662 Edgar, K., Gardiner, T. A., van Haperen, R., de Crom, R., & McDonald, D. M. (2012). eNOS  
663 overexpression exacerbates vascular closure in the obliterative phase of OIR and increases  
664 angiogenic drive in the subsequent proliferative stage. *Invest Ophthalmol Vis Sci*, *53*(11),  
665 6833-6850. doi:10.1167/iovs.12-9797
- 666 Fruttiger, M. (2007). Development of the retinal vasculature. *Angiogenesis*, *10*(2), 77-88.  
667 doi:10.1007/s10456-007-9065-1
- 668 Fukumura, D., Gohongi, T., Kadambi, A., Izumi, Y., Ang, J., Yun, C. O., . . . Jain, R. K. (2001).  
669 Predominant role of endothelial nitric oxide synthase in vascular endothelial growth factor-  
670 induced angiogenesis and vascular permeability. *Proc Natl Acad Sci U S A*, *98*(5), 2604-2609.  
671 doi:10.1073/pnas.041359198
- 672 Fulton, D., Gratton, J. P., McCabe, T. J., Fontana, J., Fujio, Y., Walsh, K., . . . Sessa, W. C.  
673 (1999). Regulation of endothelium-derived nitric oxide production by the protein kinase Akt.  
674 *Nature*, *399*(6736), 597-601. doi:10.1038/21218
- 675 Giannotta, M., Trani, M., & Dejana, E. (2013). VE-cadherin and endothelial adherens  
676 junctions: active guardians of vascular integrity. *Dev Cell*, *26*(5), 441-454.  
677 doi:10.1016/j.devcel.2013.08.020
- 678 Grimm, C., & Willmann, G. (2012). Hypoxia in the eye: a two-sided coin. *High Alt Med Biol*,  
679 *13*(3), 169-175. doi:10.1089/ham.2012.1031
- 680 Hatakeyama, T., Pappas, P. J., Hobson, R. W., 2nd, Boric, M. P., Sessa, W. C., & Duran, W. N.  
681 (2006). Endothelial nitric oxide synthase regulates microvascular hyperpermeability in vivo. *J*  
682 *Physiol*, *574*(Pt 1), 275-281. doi:10.1113/jphysiol.2006.108175
- 683 Haynes, M. P., Li, L., Sinha, D., Russell, K. S., Hisamoto, K., Baron, R., . . . Bender, J. R. (2003).  
684 Src kinase mediates phosphatidylinositol 3-kinase/Akt-dependent rapid endothelial nitric-  
685 oxide synthase activation by estrogen. *J Biol Chem*, *278*(4), 2118-2123.  
686 doi:10.1074/jbc.M210828200
- 687 Honkura, N., Richards, M., Lavina, B., Sainz-Jaspeado, M., Betsholtz, C., & Claesson-Welsh, L.  
688 (2018). Intravital imaging-based analysis tools for vessel identification and assessment of  
689 concurrent dynamic vascular events. *Nat Commun*, *9*(1), 2746. doi:10.1038/s41467-018-  
690 04929-8

2020-11-24

- 691 Klaassen, I., Van Noorden, C. J., & Schlingemann, R. O. (2013). Molecular basis of the inner  
692 blood-retinal barrier and its breakdown in diabetic macular edema and other pathological  
693 conditions. *Prog Retin Eye Res*, *34*, 19-48. doi:10.1016/j.preteyeres.2013.02.001
- 694 Krock, B. L., Skuli, N., & Simon, M. C. (2011). Hypoxia-induced angiogenesis: good and evil.  
695 *Genes Cancer*, *2*(12), 1117-1133. doi:10.1177/1947601911423654
- 696 Li, X., Padhan, N., Sjostrom, E. O., Roche, F. P., Testini, C., Honkura, N., . . . Claesson-Welsh, L.  
697 (2016). VEGFR2 pY949 signalling regulates adherens junction integrity and metastatic  
698 spread. *Nat Commun*, *7*, 11017. doi:10.1038/ncomms11017
- 699 Mintz-Hittner, H. A., Kennedy, K. A., Chuang, A. Z., & Group, B.-R. C. (2011). Efficacy of  
700 intravitreal bevacizumab for stage 3+ retinopathy of prematurity. *N Engl J Med*, *364*(7), 603-  
701 615. doi:10.1056/NEJMoa1007374
- 702 Morin, J., Luu, T. M., Superstein, R., Ospina, L. H., Lefebvre, F., Simard, M. N., . . . the  
703 Canadian Neonatal Follow-Up Network, I. (2016). Neurodevelopmental Outcomes Following  
704 Bevacizumab Injections for Retinopathy of Prematurity. *Pediatrics*, *137*(4).  
705 doi:10.1542/peds.2015-3218
- 706 Nagy, J. A., Dvorak, A. M., & Dvorak, H. F. (2012). Vascular hyperpermeability, angiogenesis,  
707 and stroma generation. *Cold Spring Harb Perspect Med*, *2*(2), a006544.  
708 doi:10.1101/cshperspect.a006544
- 709 Opatrilova, R., Kubatka, P., Caprnda, M., Busselberg, D., Krasnik, V., Vesely, P., . . . Dos  
710 Santos, K. G. (2018). Nitric oxide in the pathophysiology of retinopathy: evidences from  
711 preclinical and clinical researches. *Acta Ophthalmol*, *96*(3), 222-231. doi:10.1111/aos.13384
- 712 Orsenigo, F., Giampietro, C., Ferrari, A., Corada, M., Galaup, A., Sigismund, S., . . . Dejana, E.  
713 (2012). Phosphorylation of VE-cadherin is modulated by haemodynamic forces and  
714 contributes to the regulation of vascular permeability in vivo. *Nat Commun*, *3*, 1208.  
715 doi:10.1038/ncomms2199
- 716 Patel, A., Cholkar, K., Agrahari, V., & Mitra, A. K. (2013). Ocular drug delivery systems: An  
717 overview. *World J Pharmacol*, *2*(2), 47-64. doi:10.5497/wjp.v2.i2.47
- 718 Prahst, C., Ashrafzadeh, P., Mead, T., Figueiredo, A., Chang, K., Richardson, D., . . . Bentley, K.  
719 (2020). Mouse retinal cell behaviour in space and time using light sheet fluorescence  
720 microscopy. *Elife*, *9*. doi:10.7554/eLife.49779
- 721 Rahman, M. A., Senga, T., Ito, S., Hyodo, T., Hasegawa, H., & Hamaguchi, M. (2010). S-  
722 nitrosylation at cysteine 498 of c-Src tyrosine kinase regulates nitric oxide-mediated cell  
723 invasion. *J Biol Chem*, *285*(6), 3806-3814. doi:10.1074/jbc.M109.059782
- 724 Ribeiro, M. O., Antunes, E., de Nucci, G., Lovisololo, S. M., & Zatz, R. (1992). Chronic inhibition  
725 of nitric oxide synthesis. A new model of arterial hypertension. *Hypertension*, *20*(3), 298-303.  
726 doi:10.1161/01.hyp.20.3.298

2020-11-24

- 727 Sato, I., Obata, Y., Kasahara, K., Nakayama, Y., Fukumoto, Y., Yamasaki, T., . . . Yamaguchi, N.  
728 (2009). Differential trafficking of Src, Lyn, Yes and Fyn is specified by the state of  
729 palmitoylation in the SH4 domain. *J Cell Sci*, 122(Pt 7), 965-975. doi:10.1242/jcs.034843
- 730 Schleicher, M., Yu, J., Murata, T., Derakhshan, B., Atochin, D., Qian, L., . . . Sessa, W. C.  
731 (2009). The Akt1-eNOS axis illustrates the specificity of kinase-substrate relationships in vivo.  
732 *Sci Signal*, 2(82), ra41. doi:10.1126/scisignal.2000343
- 733 Scott, A., & Fruttiger, M. (2010). Oxygen-induced retinopathy: a model for vascular  
734 pathology in the retina. *Eye (Lond)*, 24(3), 416-421. doi:10.1038/eye.2009.306
- 735 Semenza, G. L. (2012). Hypoxia-inducible factors in physiology and medicine. *Cell*, 148(3),  
736 399-408. doi:10.1016/j.cell.2012.01.021
- 737 Sessa, W. C. (2004). eNOS at a glance. *J Cell Sci*, 117(Pt 12), 2427-2429.  
738 doi:10.1242/jcs.01165
- 739 Simko, F., Baka, T., Krajcirovicova, K., Repova, K., Aziriova, S., Zorad, S., . . . Paulis, L. (2018).  
740 Effect of Melatonin on the Renin-Angiotensin-Aldosterone System in L-NAME-Induced  
741 Hypertension. *Molecules*, 23(2). doi:10.3390/molecules23020265
- 742 Smith, L. E., Wesolowski, E., McLellan, A., Kostyk, S. K., D'Amato, R., Sullivan, R., & D'Amore,  
743 P. A. (1994). Oxygen-induced retinopathy in the mouse. *Invest Ophthalmol Vis Sci*, 35(1),  
744 101-111.
- 745 Smith, R., Ninchoji, T., Gordon, E., Andre, H., Dejana, E., Vestweber, D., . . . Claesson-Welsh,  
746 L. (2020). Vascular permeability in retinopathy is regulated by VEGFR2 Y949 signaling to VE-  
747 cadherin. *Elife*, 9. doi:10.7554/eLife.54056
- 748 Soderberg, O., Gullberg, M., Jarvius, M., Ridderstrale, K., Leuchowius, K. J., Jarvius, J., . . .  
749 Landegren, U. (2006). Direct observation of individual endogenous protein complexes in situ  
750 by proximity ligation. *Nat Methods*, 3(12), 995-1000. doi:10.1038/nmeth947
- 751 Surks, H. K., Mochizuki, N., Kasai, Y., Georgescu, S. P., Tang, K. M., Ito, M., . . . Mendelsohn,  
752 M. E. (1999). Regulation of myosin phosphatase by a specific interaction with cGMP-  
753 dependent protein kinase Ialpha. *Science*, 286(5444), 1583-1587.  
754 doi:10.1126/science.286.5444.1583
- 755 Testini, C., Smith, R. O., Jin, Y., Martinsson, P., Sun, Y., Hedlund, M., . . . Claesson-Welsh, L.  
756 (2019). Myc-dependent endothelial proliferation is controlled by phosphotyrosine 1212 in  
757 VEGF receptor-2. *EMBO Rep*, 20(11), e47845. doi:10.15252/embr.201947845
- 758 Thoonen, R., Sips, P. Y., Bloch, K. D., & Buys, E. S. (2013). Pathophysiology of hypertension in  
759 the absence of nitric oxide/cyclic GMP signaling. *Curr Hypertens Rep*, 15(1), 47-58.  
760 doi:10.1007/s11906-012-0320-5
- 761 Thors, B., Halldorsson, H., & Thorgeirsson, G. (2004). Thrombin and histamine stimulate  
762 endothelial nitric-oxide synthase phosphorylation at Ser1177 via an AMPK mediated

2020-11-24

- 763 pathway independent of PI3K-Akt. *FEBS Lett*, 573(1-3), 175-180.  
764 doi:10.1016/j.febslet.2004.07.078
- 765 Vrankova, S., Zemancikova, A., Torok, J., & Pechanova, O. (2019). Effect of low dose L-NAME  
766 pretreatment on nitric oxide/reactive oxygen species balance and vasoactivity in L-  
767 NAME/salt-induced hypertensive rats. *J Physiol Pharmacol*, 70(4).  
768 doi:10.26402/jpp.2019.4.05
- 769 Wallez, Y., Cand, F., Cruzalegui, F., Wernstedt, C., Souchelnytskyi, S., Vilgrain, I., & Huber, P.  
770 (2007). Src kinase phosphorylates vascular endothelial-cadherin in response to vascular  
771 endothelial growth factor: identification of tyrosine 685 as the unique target site. *Oncogene*,  
772 26(7), 1067-1077. doi:10.1038/sj.onc.1209855
- 773 Wells, J. A., Glassman, A. R., Ayala, A. R., Jampol, L. M., Aiello, L. P., Antoszyk, A. N., . . .  
774 Network, D. R. C. R. (2015). Aflibercept, bevacizumab, or ranibizumab for diabetic macular  
775 edema. *N Engl J Med*, 372(13), 1193-1203. doi:10.1056/NEJMoa1414264
- 776 Wessel, F., Winderlich, M., Holm, M., Frye, M., Rivera-Galdos, R., Vockel, M., . . . Vestweber,  
777 D. (2014). Leukocyte extravasation and vascular permeability are each controlled in vivo by  
778 different tyrosine residues of VE-cadherin. *Nat Immunol*, 15(3), 223-230.  
779 doi:10.1038/ni.2824
- 780 Zanfolin, M., Faro, R., Araujo, E. G., Guaraldo, A. M., Antunes, E., & De Nucci, G. (2006).  
781 Protective effects of BAY 41-2272 (sGC stimulator) on hypertension, heart, and  
782 cardiomyocyte hypertrophy induced by chronic L-NAME treatment in rats. *J Cardiovasc*  
783 *Pharmacol*, 47(3), 391-395. doi:fjc.0000210071.54828.9b
- 784 Zhao, Z., Nelson, A. R., Betsholtz, C., & Zlokovic, B. V. (2015). Establishment and Dysfunction  
785 of the Blood-Brain Barrier. *Cell*, 163(5), 1064-1078. doi:10.1016/j.cell.2015.10.067
- 786
- 787

2020-11-24

788 **List of supplemental and source files**

- 789
- 790 Figure 1 - source data 1. Raw data on retina vascular parameters and body weights from OIR
- 791 experiments on *Nos3<sup>+/+</sup>* and *Nos3<sup>S1176A/S1176A</sup>* mice
- 792
- 793 Figure 1 – supplement figure 1. Postnatal development of *Nos3<sup>+/+</sup>* and *Nos3<sup>S1176A/S1176A</sup>* retinal
- 794 vasculature
- 795
- 796 Figure 1 – supplement figure 2. Retina development in *Nos3<sup>+/+</sup>* and *Nos3<sup>S1176A/S1176A</sup>* P12 pups
- 797
- 798 Figure 1 – supplement figure 3. Expression of *Nos2*, *Nos3* and *Vegfa* in *Nos3<sup>+/+</sup>* and
- 799 *Nos3<sup>S1176A/S1176A</sup>* retinas
- 800
- 801 Figure 2 – supplement figure 1. VEGFA induced eNOS phosphorylation and activity *in vitro*
- 802
- 803 Figure 2 – supplement figure 2. c-Src pY418 immunostaining and PLA control
- 804
- 805 Figure 3 - source data 1. Raw data on retina vascular parameters and body weights from *Nos3<sup>+/+</sup>*
- 806 and *Nos3<sup>S1176A/S1176A</sup>* mice injected with microspheres
- 807
- 808 Figure 4 - source data 1. Raw data on retina vascular parameters and body weights from OIR
- 809 experiments on PBS and L-NMMA treated mice
- 810
- 811 Figure 4 – source data 2. Raw data on retina vascular parameters and body weights from OIR
- 812 experiments on *VEC<sup>+/+</sup>* and *VEC-Y685F* mice
- 813
- 814 Figure 5 - source data 1. Raw data on retina vascular parameters and body weights from *Nos3<sup>+/+</sup>*
- 815 mice treated with L-NMMA and injected with microspheres
- 816
- 817

2020-11-24

818 **Figures and Figure Legends**

819

**Figure 1**

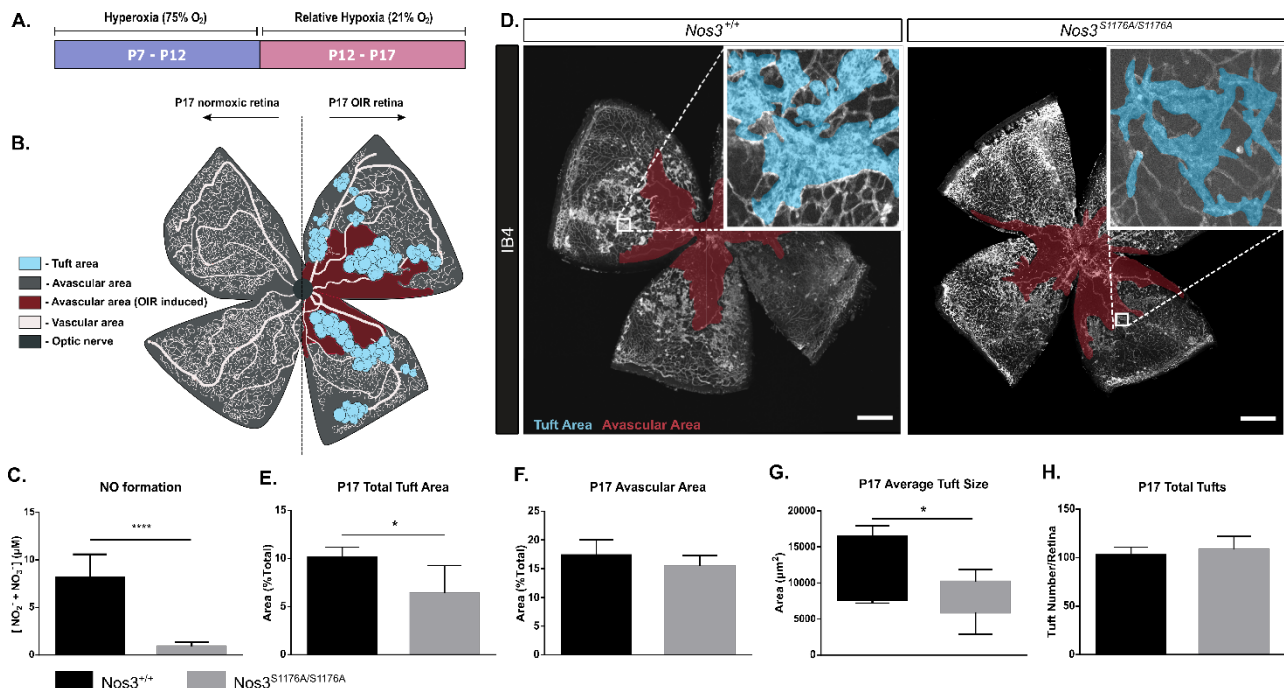

820  
821

822 **Figure 1. Suppressed tuft formation in the *Nos3*<sup>S1176A/S1176A</sup> retina after OIR-challenge**

823 A. Outline of OIR-challenge protocol; pups were placed in 75% O<sub>2</sub> (hyperoxia) between P7-P12,  
824 followed by return to normal atmosphere (relative hypoxia) until P17.  
825 B. Schematic representation of vascular abnormalities after OIR in P17 retinas.  
826 C. Nitric oxide formation determined using a Griess assay, expressed as the combined  
827 concentration of nitrite and nitrate, the end-products of NO, reacting with molecules in biological  
828 fluids. Mean ±S.E.M. n = 3 mice/genotype. \*\*\*\* = p <0.0001; t-test.  
829 D. Representative images of whole mount retinas from *Nos3*<sup>+/+</sup> and *Nos3*<sup>S1176A/S1176A</sup> mice, collected  
830 at P17 after OIR- challenge, stained with isolectin B4 (IB4). Avascular area is marked in magenta  
831 and tufts in blue. Scale bar = 500 μm.  
832 E-F. Tuft area (E) and avascular area (F) expressed as percentage of total vascular area at P17.  
833 G,H. Tuft size in μm<sup>2</sup> (G) and total number/FOV in P17 mice (H).  
834 For E-H: mean ±S.E.M. n = 7 (*Nos3*<sup>+/+</sup>) and 5 (*Nos3*<sup>S1176A/S1176A</sup>) mice. \* = p < 0.05; t-test.  
835

836 **Figure 1 - source data 1. Raw data on retina vascular parameters and body weights from OIR**  
837 **experiments on *Nos*<sup>+/+</sup> and *Nos3*<sup>S1176A/S1176A</sup> mice**

838  
839 **Figure 1 – supplement figure 1. Postnatal development of *Nos3*<sup>+/+</sup> and *Nos3*<sup>S1176A/S1176A</sup> retinal**  
840 **vasculature**

841  
842 **Figure 1 – supplement figure 2. Retina development in *Nos3*<sup>+/+</sup> and *Nos3*<sup>S1176A/S1176A</sup> P12 pups**  
843

844 **Figure 1 – supplement figure 3. Expression of *Nos2*, *Nos3* and *Vegfa* in *Nos3*<sup>+/+</sup> and**  
845 ***Nos3*<sup>S1176A/S1176A</sup> retinas**

2020-11-24

**Figure 2**

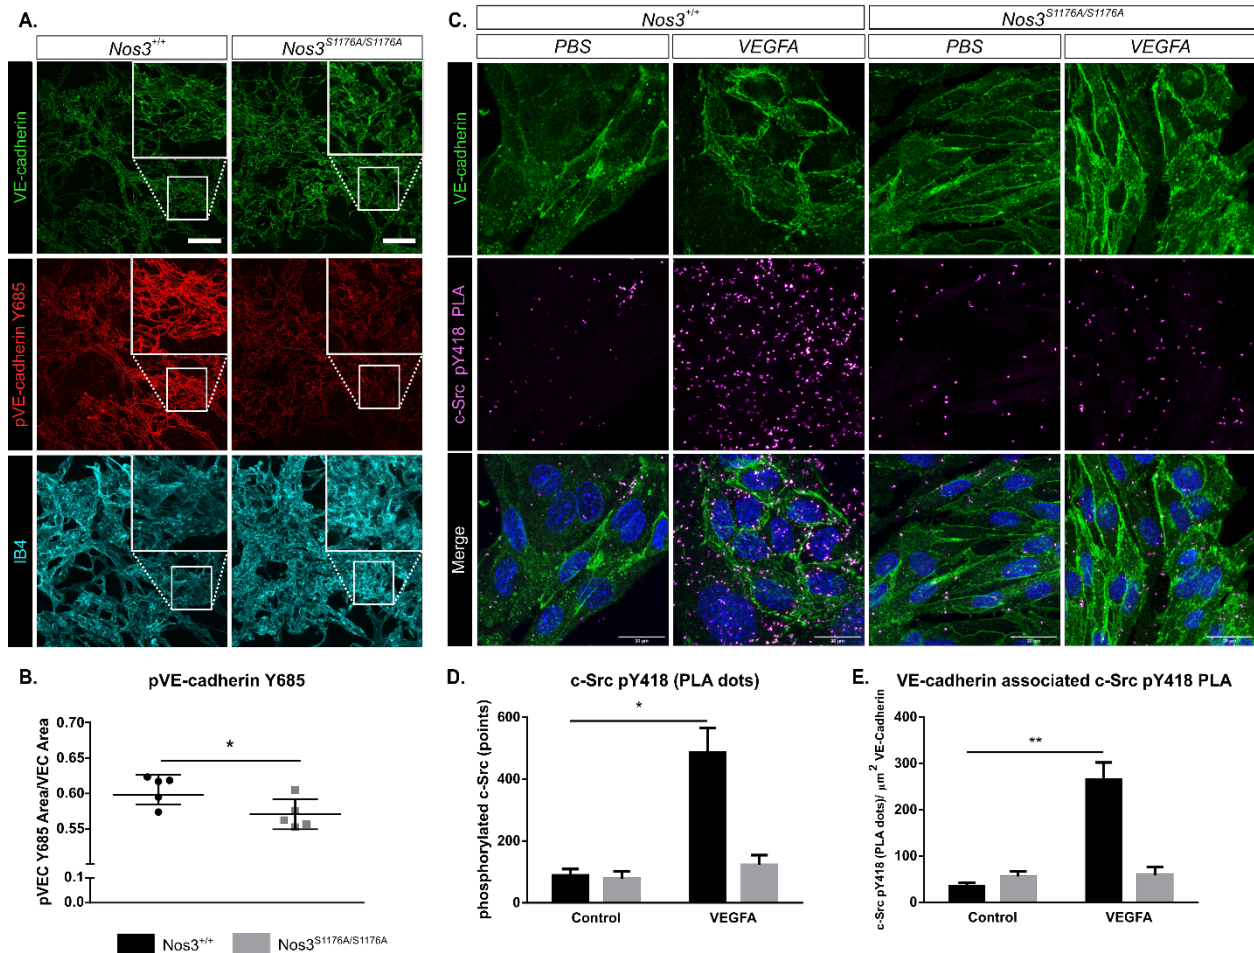

846  
847

848 **Figure 2. Suppressed c-Src Y418 and VE-cadherin Y685 phosphorylation in**  
849 ***Nos3*<sup>S1176A/S1176A</sup> retinas**

850 A. Representative maximum intensity projections of tufts from *Nos3*<sup>+/+</sup> and *Nos3*<sup>S1176A/S1176A</sup>  
851 retinas immunostained for VE-cadherin (green), pY685 VE-cadherin (red) and isolectin B4  
852 (IB4; cyan). Scale bar = 50  $\mu$ m.

853 B. Ratio of pY685 positive area/total VE-cadherin positive area.

854 Mean  $\pm$ S.E.M n = 3-6 images per group from 4 (*Nos3*<sup>+/+</sup>) and 6 (*Nos3*<sup>S1176A/S1176A</sup>) mice, 3  
855 independent experiments, \* =  $p < 0.05$ ; t-test.

856 C. Representative images of VE-cadherin staining (green) and proximity ligation assay (PLA)  
857 to detect c-Src pY418 (magenta) in isolated mouse lung endothelial cells (iEC) from *Nos3*<sup>+/+</sup>  
858 and *Nos3*<sup>S1176A/S1176A</sup> mice. Scale bar = 20  $\mu$ m.

859 D. c-Src pY418 PLA spots detected in PBS and VEGFA (100 ng/mL)-treated iECs from  
860 *Nos3*<sup>+/+</sup> and *Nos3*<sup>S1176A/S1176A</sup> mouse lungs.

861 E. c-Src pY418 PLA spots co-localized with VE-cadherin (green), normalized against total  
862 VE-cadherin area in the field of view.

863 Mean  $\pm$ S.E.M. n = 4 (*Nos3*<sup>+/+</sup>) and 4 (*Nos3*<sup>S1176A/S1176A</sup>) mice, from 3 separate experiments. \*  
864 =  $p < 0.05$ ; two-way ANOVA, Sidak's multiple comparisons test.

865

866 **Figure 2 – supplement figure 1. VEGFA induced eNOS phosphorylation and activity *in***  
867 ***vitro***

868

869 **Figure 2 – supplement figure 2. c-Src pY418 immunostaining and PLA controls**

2020-11-24

870

### Figure 3

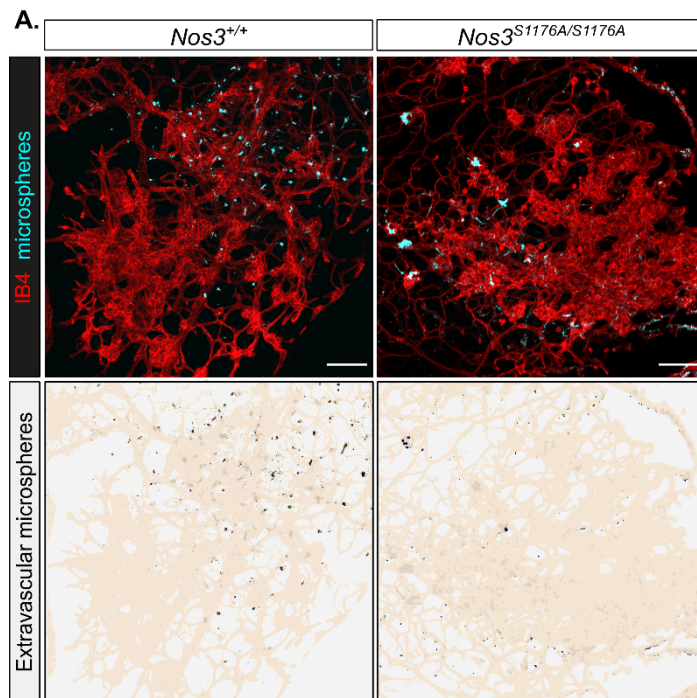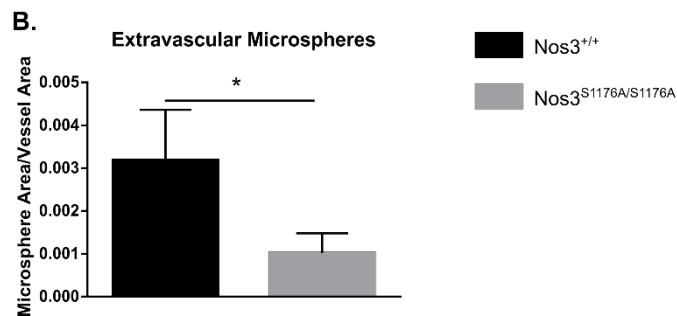

871

872

873

874

875

876

877

878

879

880

881

882

883

884

885

### Figure 3. Suppressed microsphere leakage in *Nos3<sup>S1176A/S1176A</sup>* retinas

A. Representative images of tufts from *Nos3<sup>+/+</sup>* and *Nos3<sup>S1176A/S1176A</sup>* mice immunostained for isolectin B4 (IB4; red), demonstrating leakage of tail-vein injected FITC-conjugated 25 nm microspheres (cyan) around the tufts. Scale bar = 100  $\mu$ M. Lower panels show leakage maps. Heat mapped dots that do not overlap with vessels (beige) are considered extravascular.

B. Quantification of the average area of extravascular microspheres normalized to IB4 area. Mean  $\pm$  S.E.M. n = 4 (*Nos3<sup>+/+</sup>*) and 4 (*Nos3<sup>S1176A/S1176A</sup>*) mice, 6 – 15 images per mouse. \* = p < 0.05, t-test.

Figure 3 - source data 1. Raw data on retina vascular parameters and body weights from *Nos3<sup>+/+</sup>* and *Nos3<sup>S1176A/S1176A</sup>* mice injected with microspheres



2020-11-24

Figure 4

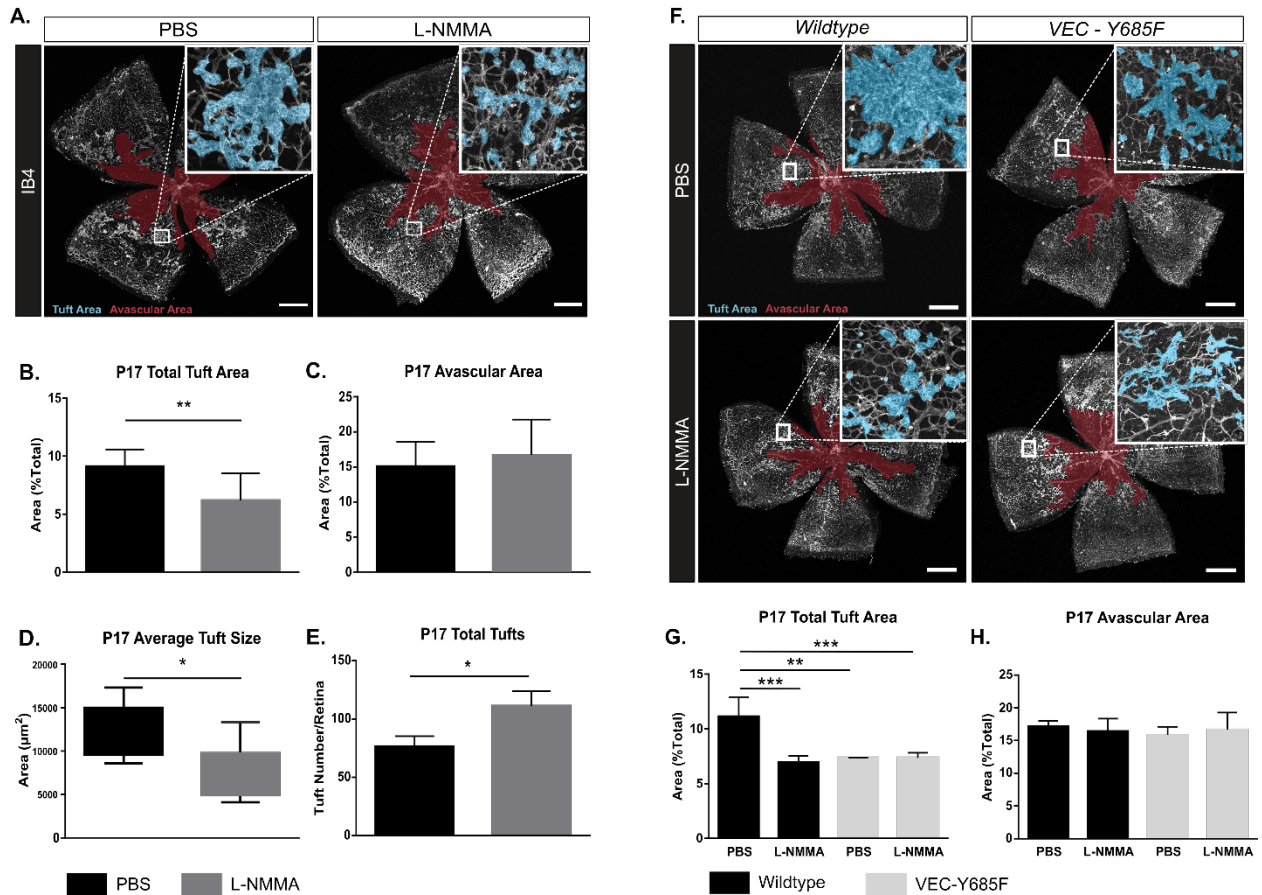

886  
887

888

889 **Figure 4. OIR-challenged mice treated with NO inhibitor L-NMMA**

890 A. Representative images of whole mount retinas from PBS and L-NMMA treated (P12-P16)

891 wildtype C57Bl/6 mice, collected on P17 after OIR challenge, and stained with isolectin B4

892 (IB4). Avascular area as a result of OIR is marked in magenta and tufts in blue. Scale bar =

893 500  $\mu\text{m}$ .

894 B, C. Tuft area and avascular area expressed as percentage of total vascular area at P17.

895 D, E. Tuft size in  $\mu\text{m}^2$  and total number of tufts/field of vision at P17.

896 Mean  $\pm$  S.E.M. n = 8 (PBS) and 9 (L-NMMA) treated mice. \*, \*\* =  $p < 0.05, 0.01$ ; t-test.

897 F. Representative images of whole mount retinas from OIR-challenged wildtype and VEC-

898 Y685F mice injected with PBS or L-NMMA during P12-P16. Immunostaining for isolectin B4

899 (IB4) at P17. Avascular area is marked in magenta and tufts in blue. Scale bar = 500  $\mu\text{m}$ .

900 G. Tuft area normalized to total vascular area in PBS or L-NMMA-treated wildtype and VEC-

901 Y685F retinas.

902 H. Avascular area normalized to total vascular area.

903 Mean  $\pm$  S.E.M. n = 8 (VEC<sup>+/+</sup>) and 8 (VEC<sup>Y685F/Y685F</sup>) mice. \*\*, \*\*\* =  $p < 0.01, 0.001$ ; two-way

904 ANOVA, Sidak's multiple comparison test.

905

906 **Figure 4 - source data 1. Raw data on retina vascular parameters and body weights**

907 **from OIR experiments on PBS and L-NMMA treated mice**

908

909 **Figure 4 – source data 2. Raw data on retina vascular parameters and body weights**

910 **from OIR experiments on VEC<sup>+/+</sup> and VEC-Y685F mice**

911

2020-11-24

912

Figure 5

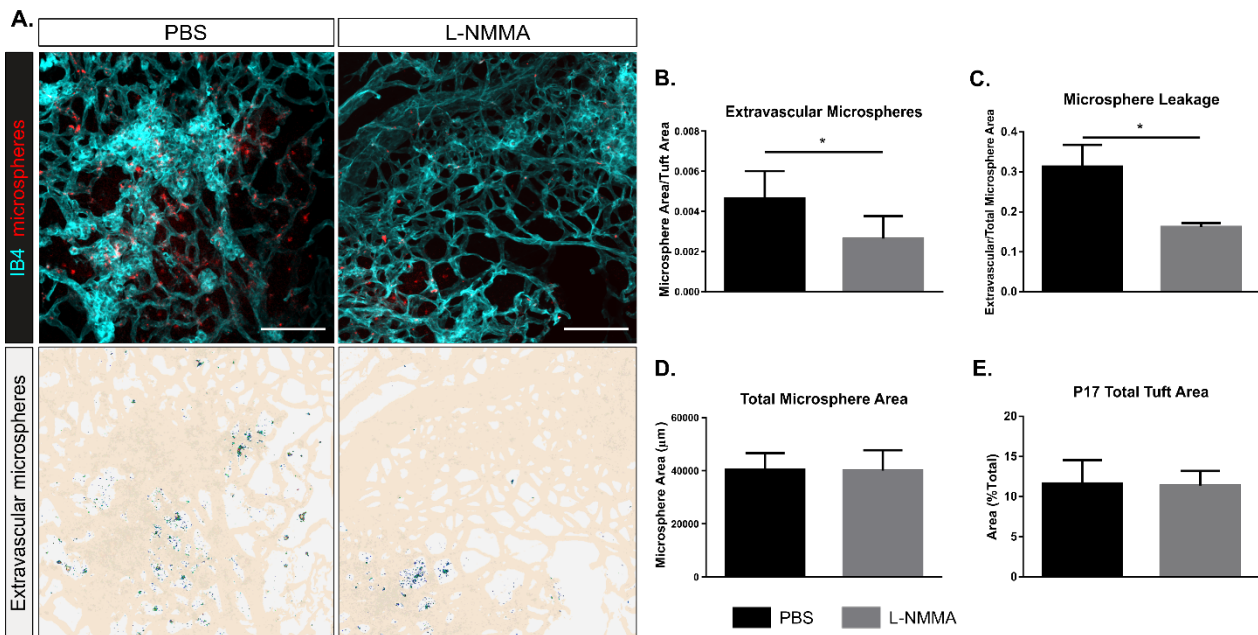

913

914

915

916 **Figure 5. Decreased leakage from retinal vascular tufts after single dose L-NMMA**

917 **treatment**

918 A. Representative images of tufts from *Nos3*<sup>+/+</sup> (wild type) mice treated with PBS or L-NMMA  
 919 (60 µg/g body weight) 24 hrs before tail-vein injection of 25 nm microspheres. Retinas were  
 920 immunostained for isolectin B4 (IB4; cyan), microspheres (red) appear in and around the  
 921 tufts. Scale bar = 100 µM. Lower panels show leakage maps. Heat mapped dots that do not  
 922 overlap with vessels (beige) are considered extravascular.

923 B. Quantification of the average area of extravascular microspheres normalized to IB4 area.

924 C. Quantification of the average area of extravascular microspheres normalized to total  
 925 microsphere area.

926 D. Quantification of average total microsphere area in PBS or L-NMMA-treated wildtype  
 927 mouse retinas.

928 E. Quantification of tuft area normalized to total vascular area.

929 Mean ± S.E.M. n = 5 (PBS) and 5 (L-NMMA) treated mice. \* = p < 0.05; t-test.

930

931 **Figure 5 - source data 1. Raw data on retina vascular parameters and body weights**  
 932 **from *Nos3*<sup>+/+</sup> mice treated with L-NMMA and injected with microspheres**

933

2020-11-24

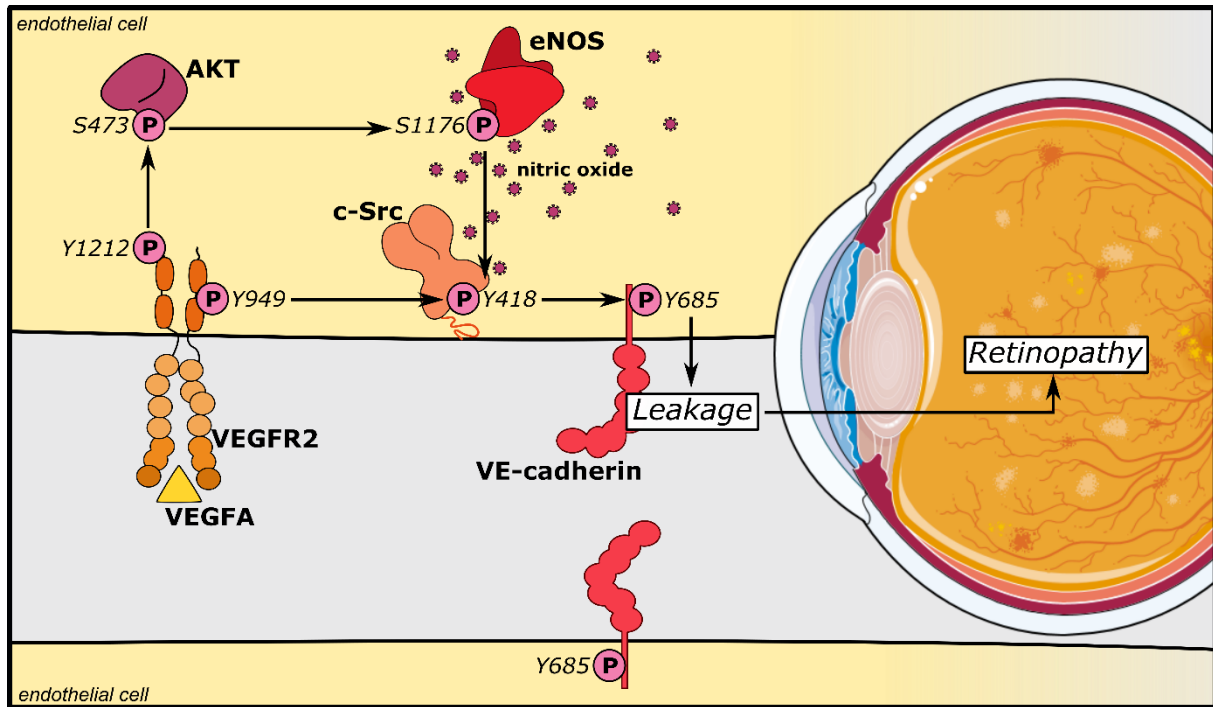

934  
935

936 **Figure 6. eNOS/NO modulates VE-cadherin Y685 phosphorylation via c-Src in a**  
937 **VEGFA/VEGFR2 dependent manner.**

938 VEGFA through VEGFR2 and its phosphosite Y1212 induces a chain of consecutive reactions  
939 in endothelial cells: phosphorylation of AKT at S473 and eNOS at S1176. The VEGFR2  
940 phosphosite Y949 mediates phosphorylation of c-Src at Y418 and of VE-cadherin at Y685.  
941 Combined, these activating phosphorylation reactions disrupt the vascular barrier by  
942 dissociating VE-cadherin's homophilic interactions, resulting in macromolecular leakage.  
943 eNOS/NO exacerbates this damage via an interaction with c-Src to enhance VE-cadherin  
944 Y685 phosphorylation and internalization.  
945

2020-11-24

Figure 1 - figure supplement 1

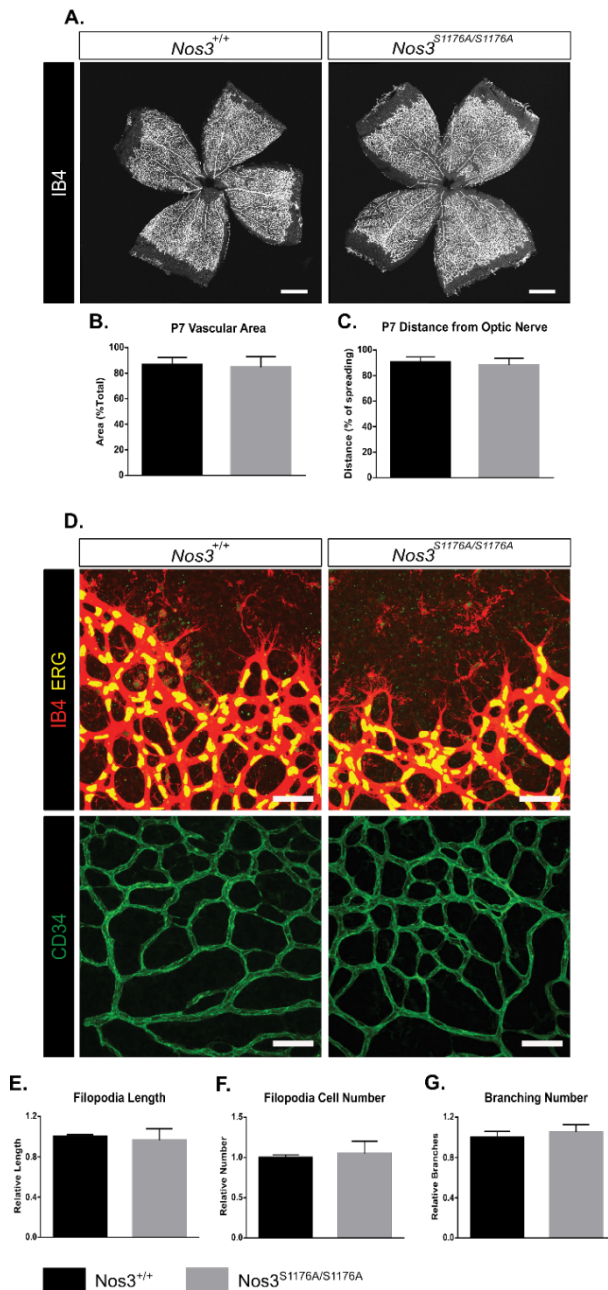

946

947

948 **Figure 1 – supplement figure 1. Postnatal development of *Nos3*<sup>+/+</sup> and *Nos3*<sup>S1176A/S1176A</sup>**

949 **retinal vasculature**

950 A. Representative images of *Nos3*<sup>+/+</sup> and *Nos3*<sup>S1176A/S1176A</sup> retinas collected at P7, stained

951 with isolectin B4 (IB4).

952 B, C. Quantification of vascular area (B) and outgrowth from the optic nerve (C) at P7 in

953 *Nos3*<sup>+/+</sup> and *Nos3*<sup>S1176A/S1176A</sup> pups.

954 D. Representative images of the vessel front from whole mount retinas collected at P7

955 stained with Isolectin-B4 (IB4, red in upper and green in lower panels) and ERG (yellow) to

956 visualise vessel outgrowth and tip cells in *Nos3*<sup>+/+</sup> and *Nos3*<sup>S1176A/S1176A</sup> retinal vasculature.

957 Scale bar = 50  $\mu$ m.

958 E-G. Filopodia length (E), tip cell number (F), branching points (G) in *Nos3*<sup>+/+</sup> and

959 *Nos3*<sup>S1176A/S1176A</sup> retinas at P7. Mean  $\pm$  S.E.M. n=3-4 mice, 5-6 images/mouse; t-test.

2020-11-24

960

## Figure 1 - figure supplement 2

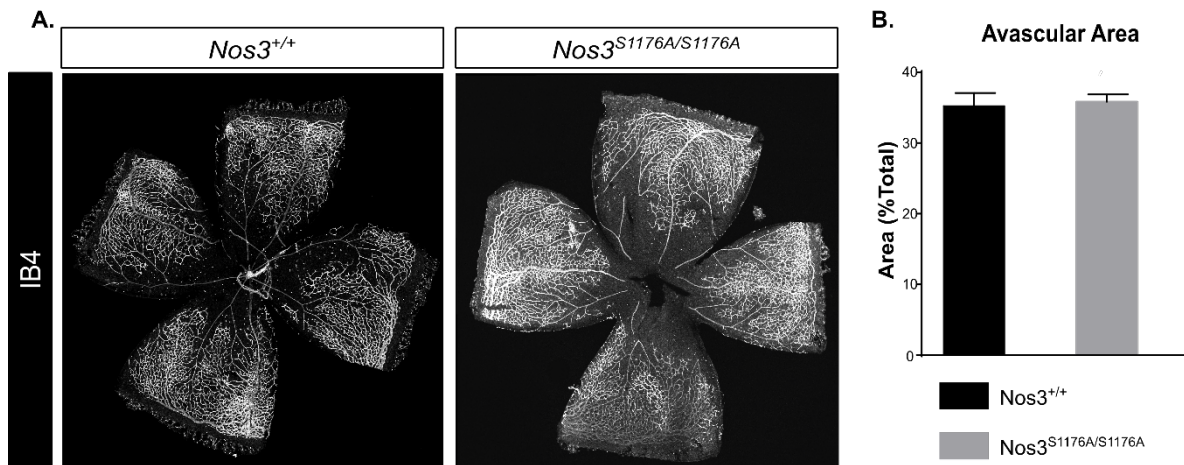

961

962

963

964

965

966

967

968

969

970

971

### Figure 1 – supplement figure 2. Retina development in *Nos3*<sup>+/+</sup> and *Nos3*<sup>S1176A/S1176A</sup> P12 pups

A. Representative images of whole mount *Nos3*<sup>+/+</sup> and *Nos3*<sup>S1176A/S1176A</sup> retinas collected at P12 after the vessel destruction phase of OIR and before vessel regrowth, stained with isolectin B4 (IB4). Scale bar = 500  $\mu$ m.

B. Avascular area in *Nos3*<sup>+/+</sup> and *Nos3*<sup>S1176A/S1176A</sup> retinas at P12 after OIR. n = 4 (*Nos3*<sup>+/+</sup>) and 5 (*Nos3*<sup>S1176A/S1176A</sup>) mice, 3 independent experiments; t-test.

2020-11-24

Figure 1 - figure supplement 3

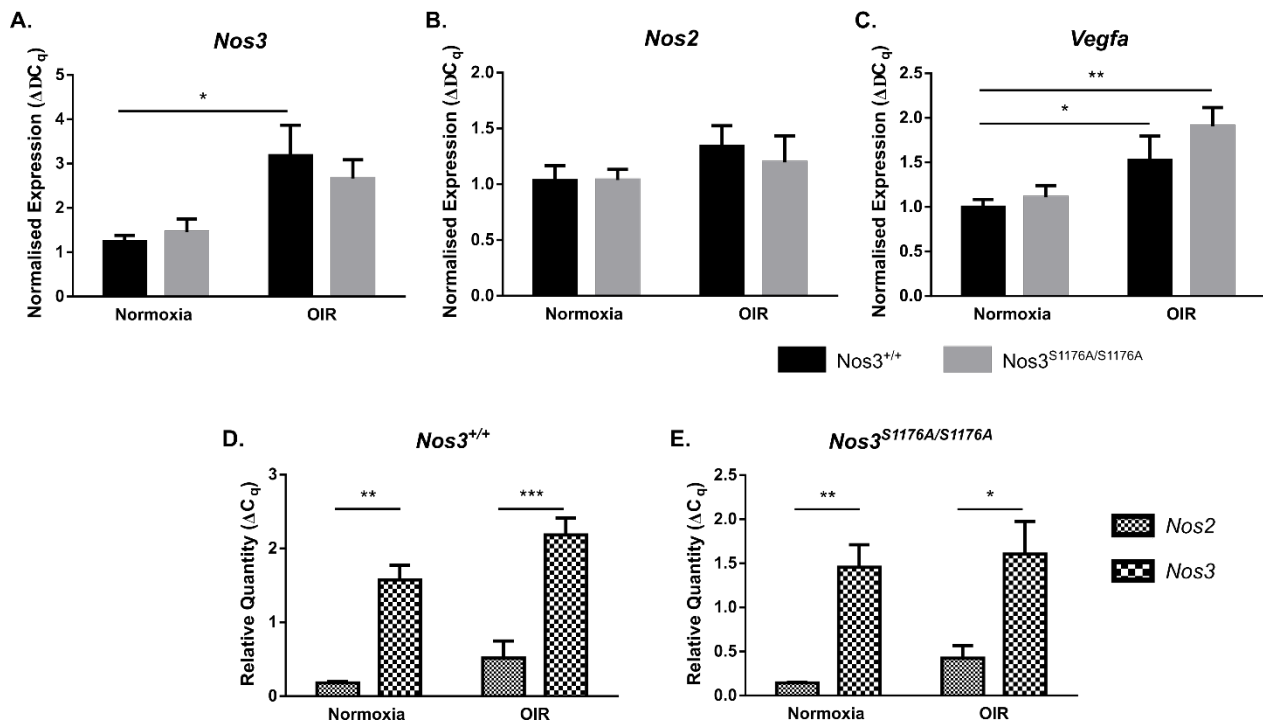

972  
973  
974  
975  
976  
977  
978  
979  
980  
981  
982  
983

Figure 1 – supplement figure 3. Expression of *Nos2*, *Nos3* and *Vegfa* in *Nos3*<sup>+/+</sup> and *Nos3*<sup>S1176A/S1176A</sup> retinas

A-C. qPCR of *Nos3* (A), *Nos2* (B) and *Vegfa* (C) expression in P17 normoxic and OIR-challenged *Nos3*<sup>+/+</sup> and *Nos3*<sup>S1176A/S1176A</sup> mouse retinas.

D,E. Relative quantities of *Nos2* and *Nos3* compared against standard curves of *TBP* and *UBC* in *Nos3*<sup>+/+</sup> and *Nos3*<sup>S1176A/S1176A</sup> retinas.

Mean ± S.E.M. n = 5 (*Nos3*<sup>+/+</sup>) and 5 (*Nos3*<sup>S1176A/S1176A</sup>) mice. \*, \*\*, \*\*\* = p < 0.05, 0.01, 0.001; two-way ANOVA, Sidak's multiple comparison test.

2020-11-24

Figure 2 - figure supplement 1

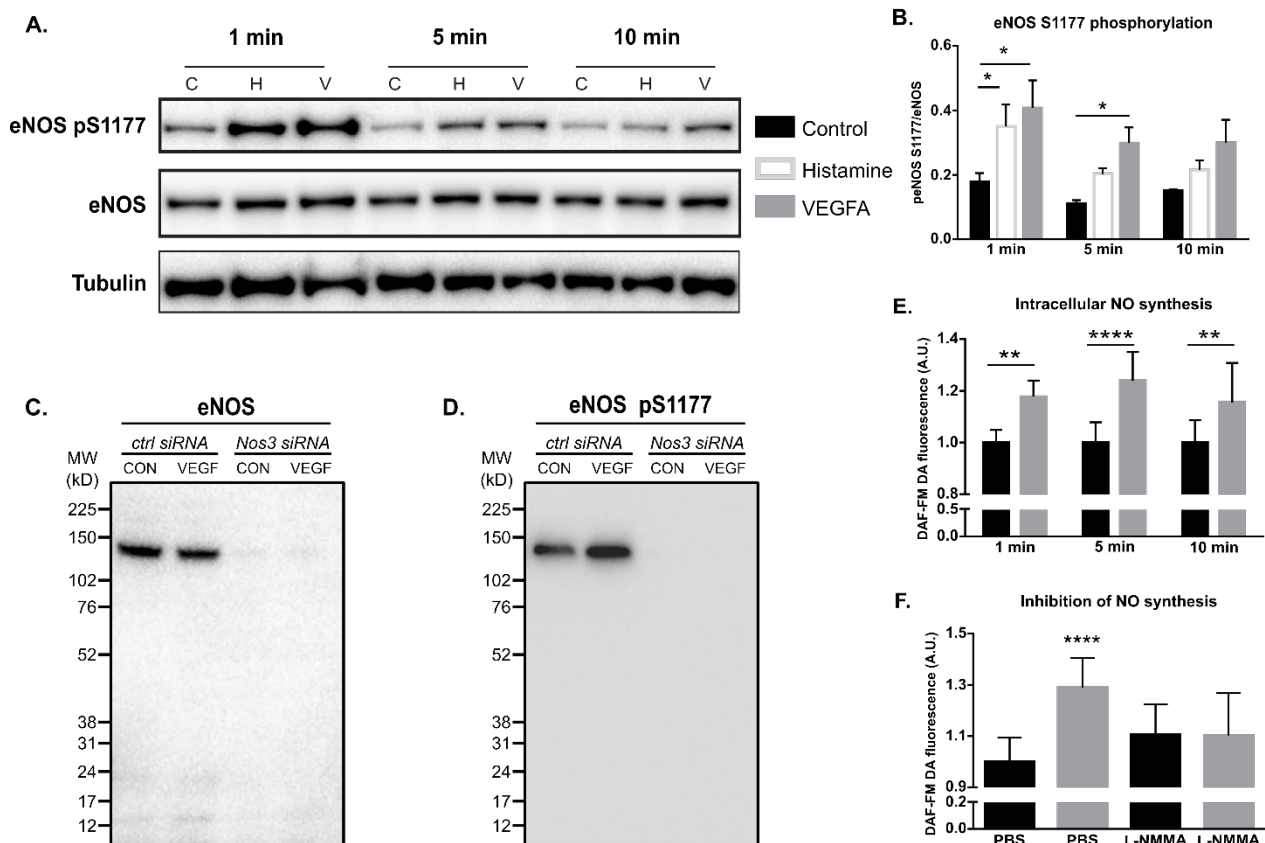

Figure 2 – supplement figure 1. VEGFA induced eNOS phosphorylation and activity *in vitro*

A. Effect of VEGFA (V; 100 ng/mL; 1, 5, 10 min), histamine (H; 10  $\mu$ M, 1, 5, 10 min) or medium (C, control) on eNOS phosphorylation at S1177 in cultured Human Retinal Microvascular Endothelial Cells (HRMEC).

B. Quantification of eNOS pS1177/total eNOS normalized to tubulin. Mean  $\pm$ S.E.M. n = 3 independent experiments. \* = p < 0.05; two-way ANOVA, Sidak's multiple comparison test.

C. Antibody validation by immunoblotting for eNOS on HRMECs transfected with a control siRNA or Nos3-specific siRNA followed by treatment with VEGFA (100 ng/mL; 5 min).

D. Antibody validation by immunoblotting for eNOS pS1177 on HRMECs transfected with a control siRNA or Nos3-specific siRNA followed by treatment with VEGFA (100 ng/mL; 5 min).

E. Quantification of NO production in HRMECs treated with PBS or VEGFA (100 ng/mL, for 1, 5 or 10 min) using the cell-permeable fluorescent probe DAF-FM DA.

F. Quantification of NO production in HRMECs pre-treated with PBS or L-NMMA (1 mM) before VEGFA stimulation (100 ng/mL, 5 min).

Mean  $\pm$ S.E.M. n = 12, 3 independent experiments. \*, \*\*, \*\*\*\* = p < 0.05, 0.01, 0.0001; two-way ANOVA, Sidak's multiple comparison test.

984

985

986

987

988

989

990

991

992

993

994

995

996

997

998

999

1000

1001

1002

1003

1004

2020-11-24

**Figure 2 - figure supplement 2**

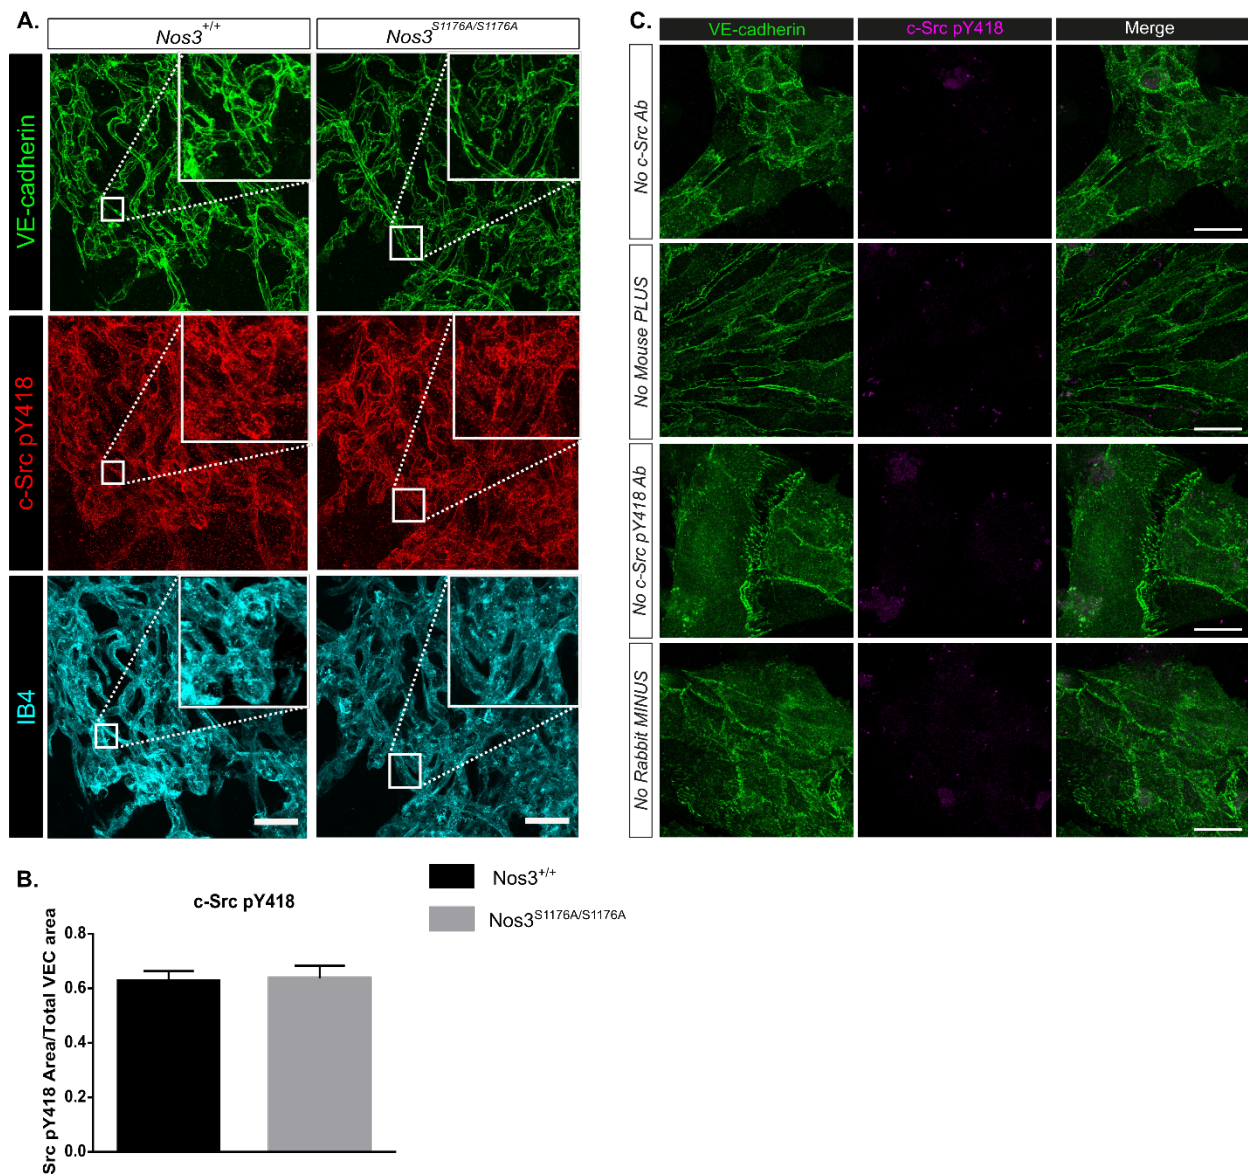

1005  
1006  
1007  
1008  
1009  
1010  
1011  
1012  
1013  
1014  
1015  
1016  
1017  
1018

**Figure 2 – supplement figure 2. c-Src pY418 immunostaining and PLA controls**

A. Representative maximum intensity projections of tufts from *Nos3*<sup>+/+</sup> and *Nos3*<sup>S1176A/S1176A</sup> retinas immunostained for VE-cadherin (green), c-Src pY418 (red) and IB4 (cyan).

B. Quantification of pY418-positive area/ total VE-cadherin area. n = 3 images per group from 3 (*Nos3*<sup>+/+</sup>) and 4 (*Nos3*<sup>S1176A/S1176A</sup>) mice from 2 separate experiments; t-test.

C. Representative images of VE-cadherin staining (green) and proximity ligation controls in isolated mouse lung endothelial cells (iEC) from *Nos3*<sup>+/+</sup> mice. Controls were performed by incubation with only one of the necessary antibodies or, one of the PLUS or MINUS PLA probes (mouse and rabbit secondary antibodies). This allows for the detection of non-specific ligation or uncontrolled rolling circle DNA synthesis. Scale bar = 20 μm.



2020-11-24

1019 **Figure 1 - source data 1. Raw data on retina vascular parameters and body weights**  
 1020 **from OIR experiments on *Nos*<sup>+/+</sup> and *Nos3*<sup>S1176A/S1176A</sup> mice**  
 1021

|                 | <i>Nos</i> <sup>+/+</sup>                 |                                      |                        | <i>Nos3</i> <sup>S1176A/S1176A</sup>      |                                      |                        |
|-----------------|-------------------------------------------|--------------------------------------|------------------------|-------------------------------------------|--------------------------------------|------------------------|
|                 | <i>Avascular area</i> ( $\mu\text{m}^2$ ) | <i>Tuft area</i> ( $\mu\text{m}^2$ ) | <i>Body weight</i> (g) | <i>Avascular area</i> ( $\mu\text{m}^2$ ) | <i>Tuft area</i> ( $\mu\text{m}^2$ ) | <i>Body weight</i> (g) |
| <b>Litter 1</b> | 19.2103                                   | 9.9423                               | 6.3                    | 18.2921                                   | 7.3468                               | 5                      |
|                 | 19.0937                                   | 8.3993                               | 6.5                    |                                           |                                      |                        |
| <b>Litter 2</b> | 14.3556                                   | 11.3058                              | 4.6                    | 14.7563                                   | 7.162                                | 4.9                    |
|                 | 20.2981                                   | 11.4639                              | 5                      |                                           |                                      |                        |
| <b>Litter 3</b> | 17.3813                                   | 9.0542                               | 8.2                    | 15.2557                                   | 5.7001                               | 8                      |
| <b>Litter 4</b> | 18.0128                                   | 10.2844                              | 5.3                    | 15.7194                                   | 9.8135                               | 5.3                    |
| <b>Litter 5</b> | 12.9869                                   | 9.1816                               | 8.9                    | 13.4687                                   | 1.9848                               | 8.6                    |
|                 | <b>Body weight</b>                        |                                      | 6.400 +/-              | <b>Body weight</b>                        |                                      | 6.360 +/-              |
|                 | <b>(mean +/- SEM)</b>                     |                                      | 0.6157                 | <b>(mean +/- SEM)</b>                     |                                      | 0.8004                 |

1022  
 1023  
 1024  
 1025  
 1026  
 1027  
 1028  
 1029  
 1030

**Figure 3 - source data 1. Raw data on retina vascular parameters and body weights**  
**from *Nos3*<sup>+/+</sup> and *Nos3*<sup>S1176A/S1176A</sup> mice injected with microspheres**

|  | <i>Nos</i> <sup>+/+</sup>            |                        | <i>Nos3</i> <sup>S1176A/S1176A</sup> |                        |
|--|--------------------------------------|------------------------|--------------------------------------|------------------------|
|  | <i>Tuft area</i> ( $\mu\text{m}^2$ ) | <i>Body weight</i> (g) | <i>Tuft area</i> ( $\mu\text{m}^2$ ) | <i>Body weight</i> (g) |
|  | 11.137                               | 5.39                   | 5.011                                | 5.47                   |
|  | 12.305                               | 6.29                   | 7.212                                | 6.06                   |
|  | 13.427                               | 5.89                   | 7.842                                | 5.85                   |
|  | 10.918                               | 6.35                   | 6.902                                | 6.17                   |
|  | <b>Body weight</b>                   |                        | <b>Body weight</b>                   |                        |
|  | <b>(mean +/- SEM)</b>                |                        | <b>(mean +/- SEM)</b>                |                        |
|  | 5.980 +/- 0.2216                     |                        | 5.888 +/- 0.1542                     |                        |

1031  
 1032

2020-11-24

1033 **Figure 4- source data 1. Raw data on retina vascular parameters and body weights**  
 1034 **from OIR experiments on PBS and L-NMMA treated mice**  
 1035

|                 | PBS                                                |                                               |                        | L-NMMA                                             |                                               |                        |
|-----------------|----------------------------------------------------|-----------------------------------------------|------------------------|----------------------------------------------------|-----------------------------------------------|------------------------|
|                 | <i>Avascular area (<math>\mu\text{m}^2</math>)</i> | <i>Tuft area (<math>\mu\text{m}^2</math>)</i> | <i>Body weight (g)</i> | <i>Avascular area (<math>\mu\text{m}^2</math>)</i> | <i>Tuft area (<math>\mu\text{m}^2</math>)</i> | <i>Body weight (g)</i> |
| <b>Litter 1</b> | 9.828                                              | 8.1122                                        | 6.97                   | 7.8733                                             | 3.9419                                        | 7.65                   |
|                 | 10.4556                                            | 6.2212                                        | 6.89                   | 12.3159                                            | 3.0607                                        | 7.62                   |
|                 | 16.1447                                            | 10.5216                                       | 6.89                   | 11.8489                                            | 4.4451                                        | 7.57                   |
| <b>Litter 2</b> | 18.05                                              | 9.7036                                        | 6.84                   | 15.06                                              | 5.332                                         | 6.97                   |
|                 | 19.95                                              | 10.925                                        | 6.85                   | 21.96                                              | 7.366                                         | 6.91                   |
|                 | 16.55                                              | 8.517                                         | 7.47                   | 22.1                                               | 4.92                                          | 7.03                   |
| <b>Litter 3</b> | 15.27                                              | 10.497                                        | 7.29                   | 18.84                                              | 7.957                                         | 7.1                    |
|                 | 14.19                                              | 9.785                                         | 6.97                   | 20.55                                              | 8.874                                         | 6.73                   |
|                 |                                                    |                                               |                        | 19.45                                              | 9.685                                         | 6.21                   |
|                 | <b>Body weight</b>                                 |                                               | 7.021 +/-              | <b>Body weight</b>                                 |                                               | 7.088 +/-              |
|                 | <b>(mean +/- SEM)</b>                              |                                               | 0.08188                | <b>(mean +/- SEM)</b>                              |                                               | 0.1572                 |

1036

1037

2020-11-24

1038 **Figure 4 - source data 2. Raw data on retina vascular parameters and body weights fro**  
 1039 **OIR experiments on VEC<sup>+/+</sup> and VEC-Y685F mice**

|                 | VEC <sup>+/+</sup>                     |                                   |                        | VEC-Y685F                              |                                   |                        |
|-----------------|----------------------------------------|-----------------------------------|------------------------|----------------------------------------|-----------------------------------|------------------------|
|                 | <i>Avascular area (μm<sup>2</sup>)</i> | <i>Tuft area (μm<sup>2</sup>)</i> | <i>Body weight (g)</i> | <i>Avascular area (μm<sup>2</sup>)</i> | <i>Tuft area (μm<sup>2</sup>)</i> | <i>Body weight (g)</i> |
| <b>Litter 1</b> | 18.8813                                | 7.2101                            | 6.20                   | 16.0002                                | 7.2785                            | 6.44                   |
|                 | 16.6561                                | 10.7006                           | 6.87                   | 17.0131                                | 7.2959                            | 6.04                   |
|                 | 16.1833                                | 6.5871                            | 5.88                   |                                        |                                   |                        |
| <b>Litter 2</b> | 16.7214                                | 14.3524                           | 6.03                   | 14.5074                                | 7.4027                            | 6.41                   |
|                 | 18.6843                                | 11.0355                           | 5.27                   | 19.8812                                | 7.6464                            | 6.42                   |
|                 | 13.8361                                | 6.2439                            | 5.96                   | 15.6838                                | 7.3574                            | 5.06                   |
| <b>Litter 3</b> | 16.7811                                | 6.3874                            | 6.50                   | 18.4210                                | 6.5015                            | 5.71                   |
|                 | 17.6931                                | 12.3057                           | 6.27                   | 16.2659                                | 7.5306                            | 5.84                   |
|                 |                                        |                                   |                        | 13.0289                                | 7.6591                            | 6.23                   |
|                 | <b>Body weight (mean +/- SEM)</b>      |                                   | 6.123 +/- 0.1663       | <b>Body weight (mean +/- SEM)</b>      |                                   | 6.019 +/- 0.1681       |

1040

1041

2020-11-24

1042 **Figure 5 - source data 1. Raw data on retina vascular parameters and body weights**  
1043 **from *Nos3<sup>+/+</sup>* mice treated with L-NMMA and injected with microspheres**

| PBS                                           |                        | L-NMMA                                        |                        |
|-----------------------------------------------|------------------------|-----------------------------------------------|------------------------|
| <i>Tuft area (<math>\mu\text{m}^2</math>)</i> | <i>Body weight (g)</i> | <i>Tuft area (<math>\mu\text{m}^2</math>)</i> | <i>Body weight (g)</i> |
| 10.187                                        | 5.98                   | 9.392                                         | 7.02                   |
| 13.606                                        | 6.20                   | 10.476                                        | 7.15                   |
| 14.734                                        | 6.54                   | 12.735                                        | 5.86                   |
| 9.495                                         | 6.13                   | 11.588                                        | 5.75                   |
| 10.280                                        | 6.82                   | 12.773                                        | 6.35                   |
| <b>Body weight<br/>(mean +/- SEM)</b>         | 6.334 +/- 0.1522       | <b>Body weight<br/>(mean +/- SEM)</b>         | 6.426 +/- 0.2881       |

1044
